# Supplementary material
Source: HighWire-hosted journal article supplement (https://www.annals.org/content/suppl/2006/07/31/145.3.209)
Supplement: Whitlock_AT1_145-3-209-DC1-1.pdf [file Whitlock_AT1_145-3-209-DC1-1.pdf]

**Appendix Table 1. Search Strategies\***

**Key Question 1**

1 HEMOCHROMATOSIS/  
 2 hemochromatosis.ti,ab.  
 3 haemochromatosis.ti,ab.  
 4 Iron Overload/  
 5 iron overload.ti,ab.  
 6 c282y.ti,ab.  
 7 1 or 2 or 3 or 4 or 5 or 6  
 8 cohort studies/ or longitudinal studies/ or follow-up  
 studies/ or prospective studies/  
 9 follow-up stud\$.ti,ab.  
 10 cohort stud\$.ti,ab.  
 11 longitudinal\$.ti,ab.  
 12 prospective\$.ti,ab.  
 13 INCIDENCE/  
 14 incidence.ti,ab.  
 15 predict\$.ti,ab,hw.  
 16 natural history.ti,ab.  
 17 penetrance/  
 18 penetran\$.ti,ab.  
 19 clinical expression\$.ti,ab.  
 20 clinical presentation\$.ti,ab.  
 21 clinical consequence\$.ti,ab.  
 22 clinical feature\$.ti,ab.  
 23 clinical manifestation\$.ti,ab.  
 24 8 or 9 or 10 or 11 or 12 or 13 or 14 or 15 or 16 or 17 or  
 18 or 19 or 20 or 21 or 22 or 23  
 25 7 and 24  
 26 limit 25 to (humans and english language)  
 27 limit 26 to "all child (0 to 18 years)"  
 28 limit 27 to "all adult (19 plus years)"  
 29 27 not 28  
 30 26 not 29  
 31 (editorial or letter or news).pt.  
 32 30 not 31

**Key Question 2**

1 HEMOCHROMATOSIS/  
 2 hemochromatosis.ti,ab.)  
 3 haemochromatosis.ti,ab.  
 4 Iron Overload/  
 5 iron overload.ti,ab.  
 6 1 or 2 or 3 or 4 or 5  
 7 BLOODLETTING/  
 8 blood lett\$.ti,ab.)  
 9 PHEBOTOMY/  
 10 phlebotom\$.ti,ab.  
 11 venesect\$.ti,ab.  
 12 7 or 8 or 9 or 10 or 11  
 13 6 and 12  
 14 Hemochromatosis/th [Therapy]  
 15 Iron Overload/th [Therapy]  
 16 13 or 14 or 15  
 17 limit 16 to (humans and english language)  
 18 limit 17 to "all child (0 to 18 years)"  
 19 limit 18 to "all adult (19 plus years)"  
 20 18 not 19  
 21 17 not 20  
 22 (editorial or letter or news).pt.  
 23 21 not 22

**Key Question 3**

1 HEMOCHROMATOSIS/  
 2 hemochromatosis.ti,ab.  
 3 haemochromatosis.ti,ab.  
 4 1 or 2 or 3  
 5 family/ or nuclear family/ or parents/ or fathers/ or  
 mothers/ or siblings/  
 (family or families).ti,ab.  
 6 (relative or relatives).ti,ab.  
 7 sibling\$.ti,ab.

**Appendix Table 1—Continued**

9 (mother\$ or father\$).ti,ab.  
 10 parent\$.ti,ab.  
 11 5 or 6 or 7 or 8 or 9 or 10  
 12 screen\$.ti,ab,hw.  
 13 diagnos\$.ti,ab,hw.  
 14 di.fs.  
 15 12 or 13 or 14  
 16 4 and 11 and 15  
 17 target\$.ti,ab.  
 18 4 and 15 and 17  
 19 Risk Factors/  
 20 risk factor\$.ti,ab.  
 21 increased risk\$.ti,ab.  
 22 high risk.ti,ab.  
 23 prognostic factor\$.ti,ab.  
 24 19 or 20 or 21 or 22 or 23  
 25 4 and 24  
 26 cascad\$.ti,ab.  
 27 4 and 26  
 28 Liver Function Tests/  
 29 liver function.ti,ab.  
 30 (abnormal\$ adj3 liver).ti,ab.  
 31 (increased adj3 liver).ti,ab.  
 32 (elevate\$ adj3 liver).ti,ab.  
 33 28 or 29 or 30 or 31 or 32  
 34 4 and 33  
 35 16 or 18 or 25 or 27 or 34  
 36 limit 35 to english language  
 37 limit 36 to humans  
 38 limit 37 to "all child (0 to 18 years)"  
 39 limit 38 to "all adult (19 plus years)"  
 40 38 not 39  
 41 37 not 40  
 42 (editorial or letter or news).pt.  
 43 41 not 42

**Background**

1 hemochromatosis  
 2 hemochromatosis.ti,ab.  
 3 haemochromatosis.ti,ab.  
 4 1 or 2 or 3  
 5 PREVALENCE/  
 6 prevalen\$.ti,ab.  
 7 5 or 6  
 8 4 and 7  
 9 HEMOCHROMATOSIS/ep [Epidemiology]  
 10 mo.fs.  
 11 "Cause of Death"/  
 12 Survival Rate/  
 13 Life Expectancy/  
 14 mortality.ti,ab.  
 15 10 or 11 or 12 or 13 or 14  
 16 4 and 15  
 17 8 or 9 or 16  
 18 limit 17 to english language  
 19 limit 18 to humans  
 20 limit 19 to "all child (0 to 18 years)"  
 21 limit 20 to "all adult (19 plus years)"  
 22 20 not 21  
 23 19 not 22  
 24 (letter or news or editorial).pt.  
 25 23 not 24

\* Databases: MEDLINE, DARE (Database of Abstracts of Reviews of Effects), Cochrane Database of Systematic Reviews, Cochrane Central Register of Controlled Trials. Dates searched: 1966 to February 2005.

*Continued*
