# Supplementary material
Source: HighWire-hosted journal article supplement (https://www.annals.org/content/suppl/2006/07/31/145.3.209)
Supplement: Whitlock_AT3_145-3-209-DC1-11.pdf [file Whitlock_AT3_145-3-209-DC1-11.pdf]

**Appendix Table 3. U.S. Preventive Services Task Force Hierarchy of Research Design and Quality Rating Criteria\***

**Hierarchy of Research Design**

- I: Properly conducted randomized, controlled trial
- II-1: Well-designed controlled trial without randomization
- II-2: Well-designed cohort or case-control analytic study
- II-3: Multiple time series with or without the intervention; dramatic results from uncontrolled experiments
- III: Opinions of respected authorities, based on clinical experience; descriptive studies or case reports; reports of expert committees

**Design-Specific Criteria**

*Systematic reviews*

Criteria

- Comprehensiveness of sources considered/search strategy used
- Standard appraisal of included studies
- Validity of conclusions
- Recency and relevance are especially important for systematic reviews

*Case-control studies*

Criteria

- Accurate ascertainment of case-patients
- Nonbiased selection of case-patients/controls with exclusion criteria applied equally to both

Response rate

- Diagnostic testing procedures applied equally to each group
- Measurement of exposure accurate and applied equally to each group
- Appropriate attention to potential confounding variables

*Randomized, controlled trials and cohort studies*

Criteria

- Initial assembly of comparable groups
  - For randomized, controlled trials: adequate randomization, including first concealment and whether potential confounders were distributed equally among groups
  - For cohort studies: consideration of potential confounders with either restriction or measurement for adjustment in the analysis; consideration of inception cohorts
- Maintenance of comparable groups (includes attrition, crossovers, adherence, contamination)
- Important differential loss to follow-up or overall high loss to follow-up
- Measurements: equal, reliable, and valid (includes masking of outcome assessment)
- Clear definition of the interventions
- All important outcomes considered

*Diagnostic accuracy studies*

Criteria

- Screening test relevant, available for primary care, adequately described
- Study uses a credible reference standard, performed regardless of test results
- Reference standard interpreted independently of screening test
- Handles indeterminate result in a reasonable manner
- Spectrum of patients included in study
- Sample size
- Administration of reliable screening test

\* Obtained from reference 67.
