# Supplementary material
Source: HighWire-hosted journal article supplement (https://www.annals.org/content/suppl/2006/07/31/145.3.209)
Supplement: Whitlock_AT4_145-3-209-DC1-2.pdf [file Whitlock_AT4_145-3-209-DC1-2.pdf]

**Appendix Table 4. Studies Excluded from Key Question 1**

| Study Citation                                                                                                                                                                                                                                                                                                                                           | Reason for Exclusion                                                                                            |
|----------------------------------------------------------------------------------------------------------------------------------------------------------------------------------------------------------------------------------------------------------------------------------------------------------------------------------------------------------|-----------------------------------------------------------------------------------------------------------------|
| Iron overload disorders among Hispanics—San Diego, California, 1995. <i>MMWR Morb Mortal Wkly Rep.</i> 1996;45:991-3. [PMID: 9005307]                                                                                                                                                                                                                    | Study disease definition does not meet our definition of asymptomatic primary iron overload or clinical disease |
| A simple genetic test identifies 90% of UK patients with haemochromatosis. The UK Haemochromatosis Consortium. <i>Gut.</i> 1997;41:841-4. [PMID: 9462220]                                                                                                                                                                                                | Not a screening population                                                                                      |
| Adams PC, Reboussin DM, Barton JC, McLaren CE, Eckfeldt JH, McLaren GD, et al. Hemochromatosis and iron-overload screening in a racially diverse population. <i>N Engl J Med.</i> 2005;352:1769-78. [PMID: 15858186]                                                                                                                                     | Does not report relevant outcomes                                                                               |
| Adams PC. Is there a threshold of hepatic iron concentration that leads to cirrhosis in C282Y hemochromatosis? <i>Am J Gastroenterol.</i> 2001;96:567-9. [PMID: 11232708]                                                                                                                                                                                | Not a screening population                                                                                      |
| Adams PC, Deugnier Y, Moirand R, Brissot P. The relationship between iron overload, clinical symptoms, and age in 410 patients with genetic hemochromatosis. <i>Hepatology.</i> 1997;25:162-6. [PMID: 8985284]                                                                                                                                           | Not a screening population                                                                                      |
| Adams PC, Gregor JC, Kertesz AE, Valberg LS. Screening blood donors for hereditary hemochromatosis: decision analysis model based on a 30-year database. <i>Gastroenterology.</i> 1995;109:177-88. [PMID: 7797016]                                                                                                                                       | Does not contain primary data                                                                                   |
| Adams PC, Kertesz AE, Valberg LS. Clinical presentation of hemochromatosis: a changing scene. <i>Am J Med.</i> 1991;90:445-9. [PMID: 2012084]                                                                                                                                                                                                            | Not a screening population                                                                                      |
| Adams PC, Speechley M, Kertesz AE. Long-term survival analysis in hereditary hemochromatosis. <i>Gastroenterology.</i> 1991;101:368-72. [PMID: 2065912]                                                                                                                                                                                                  | Not a screening population                                                                                      |
| Adams PC. Hepatic iron in hemochromatosis. <i>Dig Dis Sci.</i> 1990;35:690-2. [PMID: 2344801]                                                                                                                                                                                                                                                            | Includes data from patients < 18 y                                                                              |
| Ammann RW, Muller E, Bansky J, Schuler G, Hacki WH. High incidence of extrahepatic carcinomas in idiopathic hemochromatosis. <i>Scand J Gastroenterol.</i> 1980;15:733-6. [PMID: 6259710]                                                                                                                                                                | Not a screening population                                                                                      |
| Asberg A, Hveem K, Kruger O, Bjerve KS. Persons with screening-detected haemochromatosis: as healthy as the general population? <i>Scand J Gastroenterol.</i> 2002;37:719-24. [PMID: 12126253]                                                                                                                                                           | Study disease definition does not meet our definition of asymptomatic primary iron overload or clinical disease |
| Asberg A, Hveem K, Thorstensen K, Ellekjer E, Kannelonning K, Fjosne U, et al. Screening for hemochromatosis: high prevalence and low morbidity in an unselected population of 65,238 persons. <i>Scand J Gastroenterol.</i> 2001;36:1108-15. [PMID: 11589387]                                                                                           | Does not include C282Y genotyping in screening sequence                                                         |
| Askari AD, Muir WA, Rosner IA, Moskowitz RW, McLaren GD, Braun WE. Arthritis of hemochromatosis. Clinical spectrum, relation to histocompatibility antigens, and effectiveness of early phlebotomy. <i>Am J Med.</i> 1983;75:957-65. [PMID: 6650551]                                                                                                     | Not a screening population                                                                                      |
| Assy N, Adams PC. Predictive value of family history in diagnosis of hereditary hemochromatosis. <i>Dig Dis Sci.</i> 1997;42:1312-5. [PMID: 9201100]                                                                                                                                                                                                     | Study design                                                                                                    |
| Bacon BR, Sadiq SA. Hereditary hemochromatosis: presentation and diagnosis in the 1990s. <i>Am J Gastroenterol.</i> 1997;92:784-9. [PMID: 9149185]                                                                                                                                                                                                       | Not a screening population                                                                                      |
| Baer DM, Simons JL, Staples RL, Rumore GJ, Morton CJ. Hemochromatosis screening in asymptomatic ambulatory men 30 years of age and older. <i>Am J Med.</i> 1995;98:464-8. [PMID: 7733125]                                                                                                                                                                | Does not include C282Y genotyping in screening sequence                                                         |
| Balan V, Baldus W, Fairbanks V, Michels V, Burritt M, Klee G. Screening for hemochromatosis: a cost-effectiveness study based on 12,258 patients. <i>Gastroenterology.</i> 1994;107:453-9. [PMID: 8039622]                                                                                                                                               | Does not include C282Y genotyping in screening sequence                                                         |
| Barosi G, Salvaneschi L, Grasso M, Martinetti M, Marchetti M, Bodini U, et al. High prevalence of a screening-detected, HFE-unrelated, mild idiopathic iron overload in Northern Italy. <i>Haematologica.</i> 2002;87:472-8. [PMID: 12010659]                                                                                                            | Does not report relevant outcomes                                                                               |
| Barton JC, Cheatwood SM, Key TJ, Acton RT. Hemochromatosis detection in a health screening program at an Alabama forest products mill. <i>J Occup Environ Med.</i> 2002;44:745-51. [PMID: 12185795]                                                                                                                                                      | Does not report relevant outcomes                                                                               |
| Barton JC, Barton NH, Alford TJ. Diagnosis of hemochromatosis probands in a community hospital. <i>Am J Med.</i> 1997;103:498-503. [PMID: 9428833]                                                                                                                                                                                                       | Not a screening population                                                                                      |
| Barton JC, Shih WW, Sawada-Hirai R, Acton RT, Harmon L, Rivers C, et al. Genetic and clinical description of hemochromatosis probands and heterozygotes: evidence that multiple genes linked to the major histocompatibility complex are responsible for hemochromatosis. <i>Blood Cells Mol Dis.</i> 1997;23:135-45; discussion 145a-b. [PMID: 9215758] | Not a screening population                                                                                      |
| Bassett ML, Halliday JW, Ferris RA, Powell LW. Diagnosis of hemochromatosis in young subjects: predictive accuracy of biochemical screening tests. <i>Gastroenterology.</i> 1984;87:628-33. [PMID: 6745616]                                                                                                                                              | Participants < 18 y included                                                                                    |
| Bassett ML, Halliday JW, Powell LW. Value of hepatic iron measurements in early hemochromatosis and determination of the critical iron level associated with fibrosis. <i>Hepatology.</i> 1986;6:24-9. [PMID: 3943787]                                                                                                                                   | Does not report relevant outcomes                                                                               |
| Bell H, Thordal C, Raknerud N, Hansen T, Bosnes V, Halvorsen R, et al. Prevalence of hemochromatosis among first-time and repeat blood donors in Norway. <i>J Hepatol.</i> 1997;26:272-9. [PMID: 9059946]                                                                                                                                                | Does not include C282Y genotyping in screening sequence                                                         |
| Bell H, Berg JP, Undlien DE, Distant S, Raknerud N, Heier HE, et al. The clinical expression of hemochromatosis in Oslo, Norway. Excessive oral iron intake may lead to secondary hemochromatosis even in HFE C282Y mutation negative subjects. <i>Scand J Gastroenterol.</i> 2000;35:1301-7. [PMID: 11199371]                                           | Not a screening population                                                                                      |
| Borwein ST, Ghent CN, Flanagan PR, Chamberlain MJ, Valberg LS. Genetic and phenotypic expression of hemochromatosis in Canadians. <i>Clin Invest Med.</i> 1983;6:171-9. [PMID: 6652983]                                                                                                                                                                  | Does not report relevant outcomes                                                                               |
| Bradbear RA, Bain C, Siskind V, Schofield FD, Webb S, Axelsen EM, et al. Cohort study of internal malignancy in genetic hemochromatosis and other chronic nonalcoholic liver diseases. <i>J Natl Cancer Inst.</i> 1985;75:81-4. [PMID: 2989605]                                                                                                          | Not a screening population                                                                                      |
| Bradley LA, Haddow JE, Palomaki GE. Population screening for haemochromatosis: a unifying analysis of published intervention trials. <i>J Med Screen.</i> 1996;3:178-84. [PMID: 9041481]                                                                                                                                                                 | Review article                                                                                                  |
| Bulaj ZJ, Ajioka RS, Phillips JD, LaSalle BA, Jorde LB, Griffen LM, et al. Disease-related conditions in relatives of patients with hemochromatosis. <i>N Engl J Med.</i> 2000;343:1529-35. [PMID: 11087882]                                                                                                                                             | Quality                                                                                                         |
| Buysschaert M, Paris I, Selvais P, Hermans MP. Clinical aspects of diabetes secondary to idiopathic haemochromatosis in French-speaking Belgium. <i>Diabetes Metab.</i> 1997;23:308-13. [PMID: 9342544]                                                                                                                                                  | Case series                                                                                                     |

*Continued on following page*

Appendix Table 4—Continued

| Study Citation                                                                                                                                                                                                                                                                                          | Reason for Exclusion                                                                                            |
|---------------------------------------------------------------------------------------------------------------------------------------------------------------------------------------------------------------------------------------------------------------------------------------------------------|-----------------------------------------------------------------------------------------------------------------|
| Cadet E, Capron D, Gallet M, Omanga-Leke ML, Boutignon H, Julier C, et al. Reverse cascade screening of newborns for hereditary haemochromatosis: a model for other late onset diseases? <i>J Med Genet.</i> 2005;42:390-5. [PMID: 15863667]                                                            | Includes data from patients < 18 y<br>Cannot separate C282Y homozygotes from C282Y heterozygotes                |
| Cartwright GE, Edwards CQ, Kravitz K, Skolnick M, Amos DB, Johnson A, et al. Hereditary hemochromatosis. Phenotypic expression of the disease. <i>N Engl J Med.</i> 1979;301:175-9. [PMID: 449974]                                                                                                      | Does not report relevant outcomes                                                                               |
| Cecchetti G, Binda A, Piperno A, Nador F, Fargion S, Fiorelli G. Cardiac alterations in 36 consecutive patients with idiopathic haemochromatosis: polygraphic and echocardiographic evaluation. <i>Eur Heart J.</i> 1991;12:224-30. [PMID: 2044557]                                                     | Not a screening population                                                                                      |
| Cogswell ME, Gallagher ML, Steinberg KK, Caudill PhD SP, Looker AC, Bowman BA, et al. HFE genotype and transferrin saturation in the United States. <i>Genet Med.</i> 2003;5:304-10. [PMID: 12865759]                                                                                                   | Study disease definition does not meet our definition of asymptomatic primary iron overload or clinical disease |
| Crawford DH, Jazwinska EC, Cullen LM, Powell LW. Expression of HLA-linked hemochromatosis in subjects homozygous or heterozygous for the C282Y mutation. <i>Gastroenterology.</i> 1998;114:1003-8. [PMID: 9558290]                                                                                      | Not a screening population                                                                                      |
| Cundy T, Bomford A, Butler J, Wheeler M, Williams R. Hypogonadism and sexual dysfunction in hemochromatosis: the effects of cirrhosis and diabetes. <i>J Clin Endocrinol Metab.</i> 1989;69:110-6. [PMID: 2732293]                                                                                      | Not a screening population                                                                                      |
| Deugnier YM, Charalambous P, Le Quilleuc D, Turlin B, Searle J, Brissot P, et al. Preneoplastic significance of hepatic iron-free foci in genetic hemochromatosis: a study of 185 patients. <i>Hepatology.</i> 1993;18:1363-9. [PMID: 7902316]                                                          | Not a screening population                                                                                      |
| Distante S, Berg JP, Lande K, Haug E, Bell H. HFE gene mutation (C282Y) and phenotypic expression among a hospitalised population in a high prevalence area of haemochromatosis. <i>Gut.</i> 2000;47:575-9. [PMID: 10986220]                                                                            | Inconsistent application of exclusion criteria                                                                  |
| Edwards CQ, Griffen LM, Kushner JP. The morbidity of hemochromatosis among clinically unselected homozygotes: preliminary report. <i>Adv Exp Med Biol.</i> 1994;356:303-8. [PMID: 7887235]                                                                                                              | Does not report relevant outcomes                                                                               |
| Edwards CQ, Griffen LM, Kushner JP. Comparison of stainable liver iron between symptomatic and asymptomatic hemochromatosis homozygotes and their homozygous relatives. <i>Am J Med Sci.</i> 1991;301:44-6. [PMID: 1994729]                                                                             | Not a screening population                                                                                      |
| Edwards CQ, Griffen LM, Goldgar D, Drummond C, Skolnick MH, Kushner JP. Prevalence of hemochromatosis among 11,065 presumably healthy blood donors. <i>N Engl J Med.</i> 1988;318:1355-62. [PMID: 3367936]                                                                                              | Does not include C282Y genotyping in screening sequence                                                         |
| Edwards CQ, Cartwright GE, Skolnick MH, Amos DB. Homozygosity for hemochromatosis: clinical manifestations. <i>Ann Intern Med.</i> 1980;93:519-25. [PMID: 7436183]                                                                                                                                      | Does not report relevant outcomes                                                                               |
| Elliott R, Lin BP, Dent OF, Tait A, Smith CI. Prevalence of hemochromatosis in a random sample of asymptomatic men. <i>Aust N Z J Med.</i> 1986;16:491-5. [PMID: 3467692]                                                                                                                               | Does not include C282Y genotyping in screening sequence                                                         |
| Elmberg M, Hultcrantz R, Ekblom A, Brandt L, Olsson S, Olsson R, et al. Cancer risk in patients with hereditary hemochromatosis and in their first-degree relatives. <i>Gastroenterology.</i> 2003;125:1733-41. [PMID: 14724826]                                                                        | Not a screened population                                                                                       |
| Fargion S, Fracanzani AL, Piperno A, Braga M, D'Alba R, Ronchi G, et al. Prognostic factors for hepatocellular carcinoma in genetic hemochromatosis. <i>Hepatology.</i> 1994;20:1426-31. [PMID: 7982640]                                                                                                | Not a screening population                                                                                      |
| Fargion S, Mandelli C, Piperno A, Cesana B, Fracanzani AL, Fraquelli M, et al. Survival and prognostic factors in 212 Italian patients with genetic hemochromatosis. <i>Hepatology.</i> 1992;15:655-9. [PMID: 1312985]                                                                                  | Not a screening population                                                                                      |
| Fiel MI, Schiano TD, Bodenheimer HC, Thung SN, King TW, Varma CR, et al. Hereditary hemochromatosis in liver transplantation. <i>Liver Transpl Surg.</i> 1999;5:50-6. [PMID: 9873093]                                                                                                                   | Not a screening population                                                                                      |
| Fleming DJ, Jacques PF, Tucker KL, Massaro JM, D'Agostino RB Sr, Wilson PW, et al. Iron status of the free-living, elderly Framingham Heart Study cohort: an iron-replete population with a high prevalence of elevated iron stores. <i>Am J Clin Nutr.</i> 2001;73:638-46. [PMID: 11237943]            | Does not report relevant outcomes                                                                               |
| Fletcher LM, Dixon JL, Purdie DM, Powell LW, Crawford DH. Excess alcohol greatly increases the prevalence of cirrhosis in hereditary hemochromatosis. <i>Gastroenterology.</i> 2002;122:281-9. [PMID: 11832443]                                                                                         | Not a screening population                                                                                      |
| Fox CJ, Cullen DJ, Knuiaman MW, Cumpston GN, Divitini ML, Rossi E, et al. Effects of body iron stores and haemochromatosis genotypes on coronary heart disease outcomes in the Busseton health study. <i>J Cardiovasc Risk.</i> 2002;9:287-93. [PMID: 12394323]                                         | Study disease definition does not meet our definition of asymptomatic primary iron overload or clinical disease |
| Fracanzani AL, Conte D, Fraquelli M, Taioli E, Mattioli M, Losco A, et al. Increased cancer risk in a cohort of 230 patients with hereditary hemochromatosis in comparison to matched control patients with non-iron-related chronic liver disease. <i>Hepatology.</i> 2001;33:647-51. [PMID: 11230745] | Not a screening population                                                                                      |
| Fracanzani AL, Fargion S, Romano R, Conte D, Piperno A, D'Alba R, et al. Portal hypertension and iron depletion in patients with genetic hemochromatosis. <i>Hepatology.</i> 1995;22:1127-31. [PMID: 7557861]                                                                                           | Not a screening population                                                                                      |
| Gleeson F, Ryan E, Barrett S, Crowe J. Clinical expression of haemochromatosis in Irish C282Y homozygotes identified through family screening. <i>Eur J Gastroenterol Hepatol.</i> 2004;16:859-63. [PMID: 15316409]                                                                                     | Includes data from patients < 18 y                                                                              |
| Hallberg L, Bjorn-Rasmussen E, Jungner I. Prevalence of hereditary haemochromatosis in two Swedish urban areas. <i>J Intern Med.</i> 1989;225:249-55. [PMID: 2723582].                                                                                                                                  | Does not include C282Y genotyping in screening sequence                                                         |
| Halliday JW, Russo AM, Cowlishaw JL, Powell LW. Serum-ferritin in diagnosis of haemochromatosis. A study of 43 families. <i>Lancet.</i> 1977;2:621-4. [PMID: 71445]                                                                                                                                     | Does not report relevant outcomes                                                                               |
| Hamilton EB, Bomford AB, Laws JW, Williams R. The natural history of arthritis in idiopathic haemochromatosis: progression of the clinical and radiological features over ten years. <i>Q J Med.</i> 1981;50:321-9. [PMID: 7330169]                                                                     | Not a screening population                                                                                      |
| Jackson HA, Carter K, Darke C, Guttridge MG, Ravine D, Hutton RD, et al. HFE mutations, iron deficiency and overload in 10,500 blood donors. <i>Br J Haematol.</i> 2001;114:474-84. [PMID: 11529872]                                                                                                    | Study disease definition does not meet our definition of asymptomatic primary iron overload or clinical disease |
| Jiang R, Manson JE, Meigs JB, Ma J, Rifai N, Hu FB. Body iron stores in relation to risk of type 2 diabetes in apparently healthy women. <i>JAMA.</i> 2004;291:711-7. [PMID: 14871914]                                                                                                                  | Study design                                                                                                    |

**Appendix Table 4—Continued**

| Study Citation                                                                                                                                                                                                                                                                                        | Reason for Exclusion                                    |
|-------------------------------------------------------------------------------------------------------------------------------------------------------------------------------------------------------------------------------------------------------------------------------------------------------|---------------------------------------------------------|
| Jonsson JJ, Johannesson GM, Sigfusson N, Magnusson B, Thjodleifsson B, Magnusson S. Prevalence of iron deficiency and iron overload in the adult Icelandic population. <i>J Clin Epidemiol.</i> 1991;44:1289-97. [PMID: 1753260]                                                                      | Does not include C282Y genotyping in screening sequence |
| Jorquera F, Dominguez A, Diaz-Golpe V, Espinel J, Munoz F, Herrera A, et al. C282Y and H63D mutations of the haemochromatosis gene in patients with iron overload. <i>Rev Esp Enferm Dig.</i> 2001;93:293-302. [PMID: 11488107]                                                                       | Not a screening population                              |
| Karlsson M, Ikkala E, Reunanen A, Takkunen H, Vuori E, Makinen J. Prevalence of hemochromatosis in Finland. <i>Acta Med Scand.</i> 1988;224:385-90. [PMID: 3188989]                                                                                                                                   | Does not include C282Y genotyping in screening sequence |
| Koefoed P, Dalhoff K, Dissing J, Kramer I, Milman N, Pedersen P, et al. HFE mutations and hemochromatosis in Danish patients admitted for HFE genotyping. <i>Scand J Clin Lab Invest.</i> 2002;62:527-35. [PMID: 12512743]                                                                            | Not a screening population                              |
| Lalouel JM, Le Mignon L, Simon M, Fauchet R, Bourel M, Rao DC, et al. Genetic analysis of idiopathic hemochromatosis using both qualitative (disease status) and quantitative (serum iron) information. <i>Am J Hum Genet.</i> 1985;37:700-18. [PMID: 9556659]                                        | Does not report relevant outcomes                       |
| Leggett BA, Halliday JW, Brown NN, Bryant S, Powell LW. Prevalence of haemochromatosis amongst asymptomatic Australians. <i>Br J Haematol.</i> 1990;74:525-30. [PMID: 2346731]                                                                                                                        | Does not include C282Y genotyping in screening sequence |
| Lin E, Adams PC. Biochemical liver profile in hemochromatosis. A survey of 100 patients. <i>J Clin Gastroenterol.</i> 1991;13:316-20. [PMID: 2066547]                                                                                                                                                 | Not a screening population                              |
| Lindmark B, Eriksson S. Regional differences in the idiopathic hemochromatosis gene frequency in Sweden. <i>Acta Med Scand.</i> 1985;218:299-304. [PMID: 4072776]                                                                                                                                     | Does not include C282Y genotyping in screening sequence |
| Livesey KJ, Wilmhurst VL, Carter K, Worwood M, Cadet E, Rochette J, et al. The 16189 variant of mitochondrial DNA occurs more frequently in C282Y homozygotes with haemochromatosis than those without iron loading. <i>J Med Genet.</i> 2004;41:6-10. [PMID: 14729817]                               | Not a screening population                              |
| Mainous AG 3rd, Gill JM, Pearson WS. Should we screen for hemochromatosis? An examination of evidence of downstream effects on morbidity and mortality. <i>Arch Intern Med.</i> 2002;162:1769-74. [PMID: 12153381]                                                                                    | Does not report relevant outcomes                       |
| Mainous AG 3rd, King DE, Pearson WS, Garr DR. Is an elevated serum transferrin saturation associated with the development of diabetes? <i>J Fam Pract.</i> 2002;51:933-6. [PMID: 12485546]                                                                                                            | Does not include C282Y genotyping in screening sequence |
| Mainous AG 3rd, Wells B, Carek PJ, Gill JM, Geesey ME. The mortality risk of elevated serum transferrin saturation and consumption of dietary iron. <i>Ann Fam Med.</i> 2004;2:139-44. [PMID: 15083854]                                                                                               | Does not include C282Y genotyping in screening sequence |
| Mainous AG 3rd, Gill JM, Carek PJ. Elevated serum transferrin saturation and mortality. <i>Ann Fam Med.</i> 2004;2:133-8. [PMID: 15083853]                                                                                                                                                            | Does not include C282Y genotyping in screening sequence |
| Mainous AG 3rd, Gill JM, Everett CJ. Transferrin saturation, dietary iron intake, and risk of cancer. <i>Ann Fam Med.</i> 2005;3:131-7. [PMID: 15798039]                                                                                                                                              | Does not report relevant outcomes                       |
| Mathews JL, Williams HJ. Arthritis in hereditary hemochromatosis. <i>Arthritis Rheum.</i> 1987;30:1137-41. [PMID: 3675659]                                                                                                                                                                            | Ineligible study design                                 |
| McCune CA, Al-Jader LN, May A, Hayes SL, Jackson HA, Worwood M. Hereditary haemochromatosis: only 1% of adult HFE C282Y homozygotes in South Wales have a clinical diagnosis of iron overload. <i>Hum Genet.</i> 2002;111:538-43. [PMID: 12436244]                                                    | Not a screening population                              |
| McCune CA, Ravine D, Worwood M, Jackson HA, Evans HM, Hutton D. Screening for hereditary haemochromatosis within families and beyond. <i>Lancet.</i> 2003;362:1897-8. [PMID: 14667749]                                                                                                                | Not a screening population<br>Quality                   |
| Merryweather-Clarke AT, Worwood M, Parkinson L, Mattock C, Pointon JJ, Shearman JD, et al. The effect of HFE mutations on serum ferritin and transferrin saturation in the Jersey population. <i>Br J Haematol.</i> 1998;101:369-73. [PMID: 9609537]                                                  | Does not report relevant outcomes                       |
| Milman N, Pedersen P, Steig T, Byg KE, Graudal N, Fenger K. Clinically overt hereditary hemochromatosis in Denmark 1948-1985: epidemiology, factors of significance for long-term survival, and causes of death in 179 patients. <i>Ann Hematol.</i> 2001;80:737-44. [PMID: 11797115]                 | Quality                                                 |
| Milman N. Iron status markers in hereditary haemochromatosis: distinction between individuals being homozygous and heterozygous for the haemochromatosis allele. <i>Eur J Haematol.</i> 1991;47:292-8. [PMID: 1954989]                                                                                | Does not report relevant outcomes                       |
| Moirand R, Jouanolle AM, Brissot P, Le Gall JY, David V, Deugnier Y. Phenotypic expression of HFE mutations: a French study of 1110 unrelated iron-overloaded patients and relatives. <i>Gastroenterology.</i> 1999;116:372-7. [PMID: 9922318]                                                        | Does not report relevant outcomes                       |
| Moodie SJ, Ang L, Stenner JM, Finlayson C, Khotari A, Levin GE, et al. Testing for haemochromatosis in a liver clinic population: relationship between ethnic origin, HFE gene mutations, liver histology and serum iron markers. <i>Eur J Gastroenterol Hepatol.</i> 2002;14:223-9. [PMID: 11953685] | Not a screening population                              |
| Morrison ED, Brandhagen DJ, Phatak PD, Barton JC, Krawitt EL, El-Serag HB, et al. Serum ferritin level predicts advanced hepatic fibrosis among U.S. patients with phenotypic hemochromatosis. <i>Ann Intern Med.</i> 2003;138:627-33. [PMID: 12693884]                                               | Not a screening population                              |
| Mura C, Noubbaum JB, Verger P, Moalic MT, Ragueneas O, Mercier AY, et al. Phenotype-genotype correlation in haemochromatosis subjects. <i>Hum Genet.</i> 1997;101:271-6. [PMID: 9439654]                                                                                                              | Not a screening population                              |
| Nash S, Marconi S, Sikorska K, Naeem R, Nash G. Role of liver biopsy in the diagnosis of hepatic iron overload in the era of genetic testing. <i>Am J Clin Pathol.</i> 2002;118:73-81. [PMID: 12109859]                                                                                               | Not a screening population                              |
| Nelson RL, Persky V, Davis F, Becker E. Risk of disease in siblings of patients with hereditary hemochromatosis. <i>Digestion.</i> 2001;64:120-4. [PMID: 11684826]                                                                                                                                    | Quality                                                 |
| Niederer C, Niederer CM, Lange S, Littauer A, Abdel-Jalil N, Maurer M, et al. Screening for hemochromatosis and iron deficiency in employees and primary care patients in Western Germany. <i>Ann Intern Med.</i> 1998;128:337-45. [PMID: 9490593]                                                    | Does not include C282Y genotyping in screening sequence |
| Olsson KS, Eriksson K, Ritter B, Heedman PA. Screening for iron overload using transferrin saturation. <i>Acta Med Scand.</i> 1984;215:105-12. [PMID: 6702489]                                                                                                                                        | Does not include C282Y genotyping in screening sequence |

*Continued on following page*

**Appendix Table 4—Continued**

| Study Citation                                                                                                                                                                                                                                                                                                                                         | Reason for Exclusion                                                                                            |
|--------------------------------------------------------------------------------------------------------------------------------------------------------------------------------------------------------------------------------------------------------------------------------------------------------------------------------------------------------|-----------------------------------------------------------------------------------------------------------------|
| Olsson KS, Ritter B, Lundin PM. Liver affection in iron overload studied with serum ferritin and serum aminotransferases. <i>Acta Med Scand.</i> 1985;217:79-84. [PMID: 3976436]                                                                                                                                                                       | Not a screening population                                                                                      |
| Olynyk JK, Luxon BA, Britton RS, Bacon BR. Hepatic iron concentration in hereditary hemochromatosis does not saturate or accurately predict phlebotomy requirements. <i>Am J Gastroenterol.</i> 1998;93:346-50. [PMID: 9517637]                                                                                                                        | Does not report relevant outcomes                                                                               |
| Panajotopoulos N, Piperno A, Conte D, Mandelli C, Cesana M, Mercuriali F, et al. HLA typing in 67 Italian patients with idiopathic hemochromatosis and their relatives. <i>Tissue Antigens.</i> 1989;33:431-6. [PMID: 2734773]                                                                                                                         | Study design                                                                                                    |
| Phatak PD, Sham RL, Raubertas RF, Dunnigan K, O'Leary MT, Braggins C, et al. Prevalence of hereditary hemochromatosis in 16031 primary care patients. <i>Ann Intern Med.</i> 1998;129:954-61. [PMID: 9867748]                                                                                                                                          | Does not include C282Y genotyping in screening sequence                                                         |
| Piperno A, Vergani A, Salvioni A, Trombini P, Vigana M, Riva A, et al. Effects of venesections and restricted diet in patients with the insulin-resistance hepatic iron overload syndrome. <i>Liver Int.</i> 2004;24:471-6. [PMID: 15482345]                                                                                                           | Not a screening population                                                                                      |
| Porto G, Vicente C, Fraga J, da Silva BM, de Sousa M. Importance of establishing appropriate local reference values for the screening of hemochromatosis: a study of three different control populations and 136 hemochromatosis family members. Hemochromatosis Clinical and Research Group. <i>J Lab Clin Med.</i> 1992;119:295-305. [PMID: 1541878] | Includes data from patients < 18 y                                                                              |
| Porto G, Vicente C, Teixeira MA, Martins O, Cabeda JM, Lacerda R, et al. Relative impact of HLA phenotype and CD4-CD8 ratios on the clinical expression of hemochromatosis. <i>Hepatology.</i> 1997;25:397-402. [PMID: 9021953]                                                                                                                        | Not a screening population                                                                                      |
| Poullis A, Moodie SJ, Ang L, Finlayson CJ, Levin GE, Maxwell JD. Routine transferrin saturation measurement in liver clinic patients increases detection of hereditary haemochromatosis. <i>Ann Clin Biochem.</i> 2003;40:521-7. [PMID: 14503989]                                                                                                      | Not a screening population                                                                                      |
| Powell LW, Summers KM, Board PG, Axelsen E, Webb S, Halliday JW. Expression of hemochromatosis in homozygous subjects. Implications for early diagnosis and prevention. <i>Gastroenterology.</i> 1990;98:1625-32. [PMID: 2338199]                                                                                                                      | Includes data from patients < 18 y                                                                              |
| Poynard T, Mathurin P, Lai CL, Guyader D, Poupon R, Tainturier MH, et al. A comparison of fibrosis progression in chronic liver diseases. <i>J Hepatol.</i> 2003;38:257-65. [PMID: 12586290]                                                                                                                                                           | Not a screening population                                                                                      |
| Press RD, Flora K, Gross C, Rabkin JM, Corless CL. Hepatic iron overload: direct HFE (HLA-H) mutation analysis vs quantitative iron assays for the diagnosis of hereditary hemochromatosis. <i>Am J Clin Pathol.</i> 1998;109:577-84. [PMID: 9576576]                                                                                                  | Not a screening population                                                                                      |
| Rhodes DA, Raha-Chowdhury R, Cox TM, Trowsdale J. Homozygosity for the predominant Cys282Tyr mutation and absence of disease expression in hereditary haemochromatosis. <i>J Med Genet.</i> 1997;34:761-4. [PMID: 9321765]                                                                                                                             | Does not report relevant outcomes                                                                               |
| Roberts AG, Whatley SD, Morgan RR, Worwood M, Elder GH. Increased frequency of the haemochromatosis Cys282Tyr mutation in sporadic porphyria cutanea tarda. <i>Lancet.</i> 1997;349:321-3. [PMID: 9024376]                                                                                                                                             | Does not report relevant outcomes                                                                               |
| Rossi E, Henderson S, Chin CY, Olynyk J, Beilby JP, Reed WD, et al. Genotyping as a diagnostic aid in genetic haemochromatosis. <i>J Gastroenterol Hepatol.</i> 1999;14:427-30. [PMID: 10355506]                                                                                                                                                       | Not a screening population                                                                                      |
| Rowe JW, Wands JR, Mezey E, Waterbury LA, Wright JR, Tobin J, et al. Familial hemochromatosis: characteristics of the precirrhotic stage in a large kindred. <i>Medicine (Baltimore).</i> 1977;56:197-211. [PMID: 870791]                                                                                                                              | Does not report relevant outcomes                                                                               |
| Ryan E, Byrnes V, Coughlan B, Flanagan AM, Barrett S, O'Keane JC, et al. Underdiagnosis of hereditary haemochromatosis: lack of presentation or penetration? <i>Gut.</i> 2002;51:108-12. [PMID: 12077102]                                                                                                                                              | Includes data from patients < 18 y                                                                              |
| Salonen JT, Tuomainen TP, Kontula K. Role of C282Y mutation in haemochromatosis gene in development of type 2 diabetes in healthy men: prospective cohort study. <i>BMJ.</i> 2000;320:1706-7. [PMID: 10864547]                                                                                                                                         | Does not report relevant outcomes                                                                               |
| Scotet V, Merour MC, Mercier AY, Chanu B, Le Faou T, Raguene O, et al. Hereditary hemochromatosis: effect of excessive alcohol consumption on disease expression in patients homozygous for the C282Y mutation. <i>Am J Epidemiol.</i> 2003;158:129-34. [PMID: 12851225]                                                                               | Does not report relevant outcomes                                                                               |
| Sham RL, Ou CY, Cappuccio J, Braggins C, Dunnigan K, Phatak PD. Correlation between genotype and phenotype in hereditary hemochromatosis: analysis of 61 cases. <i>Blood Cells Mol Dis.</i> 1997;23:314-20. [PMID: 9410475]                                                                                                                            | Not a screening population                                                                                      |
| Sham RL, Raubertas RF, Braggins C, Cappuccio J, Gallagher M, Phatak PD. Asymptomatic hemochromatosis subjects: genotypic and phenotypic profiles. <i>Blood.</i> 2000;96:3707-11. [PMID: 11090050]                                                                                                                                                      | Not a screening population                                                                                      |
| Smith BN, Kantrowitz W, Grace ND, Greenberg MS, Patton TJ, Ookubo R, et al. Prevalence of hereditary hemochromatosis in a Massachusetts corporation: is Celtic origin a risk factor? <i>Hepatology.</i> 1997;25:1439-46. [PMID: 9185765]                                                                                                               | Does not include C282Y genotyping in screening sequence                                                         |
| Waalén J, Nordstgaard BG, Beutler E. The penetrance of hereditary hemochromatosis. <i>Best Pract Res Clin Haematol.</i> 2005;18:203-20. [PMID: 15737885]                                                                                                                                                                                               | Review article                                                                                                  |
| Wands JR, Rowe JA, Mezey SE, Waterbury LA, Wright JR, Halliday JW, et al. Normal serum ferritin concentrations in precirrhotic hemochromatosis. <i>N Engl J Med.</i> 1976;294:302-5. [PMID: 1246269]                                                                                                                                                   | Does not report relevant outcomes                                                                               |
| Wiggers P, Dalhoj J, Kiaer H, Ring-Larsen H, Petersen PH, Blaabjerg O, et al. Screening for haemochromatosis: prevalence among Danish blood donors. <i>J Intern Med.</i> 1991;230:265-70. [PMID: 1895049]                                                                                                                                              | Does not include C282Y genotyping in screening sequence                                                         |
| Willis G, Jennings BA, Goodman E, Fellows IW, Wimperis JZ. A high prevalence of HLA-H 845A mutations in hemochromatosis patients and the normal population in eastern England. <i>Blood Cells Mol Dis.</i> 1997;23:288-91. [PMID: 9410472]                                                                                                             | Does not report relevant outcomes                                                                               |
| Willis G, Wimperis JZ, Lonsdale R, Fellows IW, Watson MA, Skipper LM, et al. Incidence of liver disease in people with HFE mutations. <i>Gut.</i> 2000;46:401-4. [PMID: 10673304]                                                                                                                                                                      | Does not report relevant outcomes                                                                               |
| Willis G, Wimperis JZ, Smith K, Fellows IW, Jennings BA. HFE mutations in the elderly. <i>Blood Cells Mol Dis.</i> 2003;31:240-6. [PMID: 12972032]                                                                                                                                                                                                     | Study disease definition does not meet our definition of asymptomatic primary iron overload or clinical disease |
| Wojcik JP, Speechley MR, Kertesz AE, Chakrabarti S, Adams PC. Natural history of C282Y homozygotes for hemochromatosis. <i>Can J Gastroenterol.</i> 2002;16:297-302. [PMID: 12045778]                                                                                                                                                                  | Not a screening population<br>Includes data from patients < 18 y                                                |
| Yamashita C, Adams PC. Natural history of the C282Y homozygote for the hemochromatosis gene (HFE) with a normal serum ferritin level. <i>Clin Gastroenterol Hepatol.</i> 2003;1:388-91. [PMID: 15017658]                                                                                                                                               | Not a screening population                                                                                      |
