# Supplementary material
Source: HighWire-hosted journal article supplement (https://www.annals.org/content/suppl/2006/07/31/145.3.209)
Supplement: Whitlock_AT6_145-3-209-DC1-4.pdf [file Whitlock_AT6_145-3-209-DC1-4.pdf]

**Appendix Table 6. Studies Excluded from Key Question 3**

| Study Citation                                                                                                                                                                                                                                               | Reason for Exclusion                                     |
|--------------------------------------------------------------------------------------------------------------------------------------------------------------------------------------------------------------------------------------------------------------|----------------------------------------------------------|
| Adams PC, Agnew S. Alcoholism in hereditary hemochromatosis revisited: prevalence and clinical consequences among homozygous siblings. <i>Hepatology</i> . 1996;23:724-7. [PMID: 8666324]                                                                    | Case series                                              |
| Adams PC, Kertesz AE, Valberg LS. Clinical presentation of hemochromatosis: a changing scene. <i>Am J Med</i> . 1991;90:445-9. [PMID: 2012084]                                                                                                               | Case series                                              |
| Adams PC, Kertesz AE, Valberg LS. Screening for hemochromatosis in children of homozygotes: prevalence and cost-effectiveness. <i>Hepatology</i> . 1995;22:1720-7. [PMID: 7489980]                                                                           | <18 y included                                           |
| Adams PC. Haemochromatosis: find them or forget about them? <i>Eur J Gastroenterol Hepatol</i> . 2004;16:857-8. [PMID: 15316408]                                                                                                                             | Editorial                                                |
| Assy N, Adams PC. Predictive value of family history in diagnosis of hereditary hemochromatosis. <i>Dig Dis Sci</i> . 1997;42:1312-5. [PMID: 9201100]                                                                                                        | No HFE testing                                           |
| Bacon BR, Olynyk JK, Brunt EM, Britton RS, Wolff RK. HFE genotype in patients with hemochromatosis and other liver diseases. <i>Ann Intern Med</i> . 1999;130:953-62. [PMID: 10383365]                                                                       | Does not meet our definition of clinical hemochromatosis |
| Bassett ML, Halliday JW, Ferris RA, Powell LW. Diagnosis of hemochromatosis in young subjects: predictive accuracy of biochemical screening tests. <i>Gastroenterology</i> . 1984;87:628-33. [PMID: 6745616]                                                 | Does not include primary results                         |
| Bassett ML, Halliday JW, Powell LW. Value of hepatic iron measurements in early hemochromatosis and determination of the critical iron level associated with fibrosis. <i>Hepatology</i> . 1986;6:24-9. [PMID: 3943787]                                      | Case series                                              |
| Bhavnani M, Lloyd D, Bhattacharyya A, Marples J, Elton P, Worwood M. Screening for genetic haemochromatosis in blood samples with raised alanine aminotransferase. <i>Gut</i> . 2000;46:707-10. [PMID: 10764716]                                             | Quality                                                  |
| Bonkovsky HL, Jawaid Q, Tortorelli K, LeClair P, Cobb J, Lambrecht RW, et al. Non-alcoholic steatohepatitis and iron: increased prevalence of mutations of the HFE gene in non-alcoholic steatohepatitis. <i>J Hepatol</i> . 1999;31:421-9. [PMID: 10488699] | Does not meet our definition of clinical hemochromatosis |
| Bregman H, Gelfand MC, Winchester JF, Manz HJ, Kneppshield JH, Schreiner GE. iron-overload-associated myopathy in patients on maintenance haemodialysis: a histocompatibility-linked disorder. <i>Lancet</i> . 1980;2:882-5. [PMID: 6107546]                 | Not the correct population                               |
| Brissot P, Moirand R, Jouanolle AM, Guyader D, Le Gall JY, Deugnier Y, et al. A genotypic study of 217 unrelated probands diagnosed as "genetic hemochromatosis" on "classical" phenotypic criteria. <i>J Hepatol</i> . 1999;30:588-93. [PMID: 10207799]     | Does not report relevant prevalence or risk measures     |
| Campo S, Restuccia T, Villari D, Raffa G, Cucinotta D, Squadrito G, et al. Analysis of haemochromatosis gene mutations in a population from the Mediterranean Basin. <i>Liver</i> . 2001;21:233-6. [PMID: 11454185]                                          | Not the correct population                               |
| Cavanaugh JA, Wilson SR, Bassett ML. Genetic testing for HFE hemochromatosis in Australia: the value of testing relatives of simple heterozygotes. <i>J Gastroenterol Hepatol</i> . 2002;17:800-3. [PMID: 12121511]                                          | Does not include primary results                         |
| Conte D, Manachino D, Colli A, Guala A, Aimo G, Andreoletti M, et al. Prevalence of genetic hemochromatosis in a cohort of Italian patients with diabetes mellitus. <i>Ann Intern Med</i> . 1998;128:370-3. [PMID: 9490597]                                  | Not the correct population                               |
| Dalury DF, Ewald FC, Christie MJ, Scott RD. Total knee arthroplasty in a group of patients less than 45 years of age. <i>J Arthroplasty</i> . 1995;10:598-602. [PMID: 9273369]                                                                               | Does not report relevant prevalence or risk measures     |
| Ellervik C, Mandrup-Poulsen T, Nordestgaard BG, Larsen LE, Appleyard M, Frandsen M, et al. Prevalence of hereditary haemochromatosis in late-onset type 1 diabetes mellitus: a retrospective study. <i>Lancet</i> . 2001;358:1405-9. [PMID: 11705485]        | Not the correct population                               |
| Feller ER, Pont A, Wands JR, Carter EA, Foster G, Kourides IA, et al. Familial hemochromatosis. Physiologic studies in the precirrhotic stage of the disease. <i>N Engl J Med</i> . 1977;296:1422-6. [PMID: 194151]                                          | Case series                                              |
| Fiel MI, Schiano TD, Bodenheimer HC, Thung SN, King TW, Varma CR, et al. Hereditary hemochromatosis in liver transplantation. <i>Liver Transpl Surg</i> . 1999;5:50-6. [PMID: 9873093]                                                                       | Does not report relevant prevalence or risk measures     |
| Gleeson F, Ryan E, Barrett S, Crowe J. Clinical expression of haemochromatosis in Irish C282Y homozygotes identified through family screening. <i>Eur J Gastroenterol Hepatol</i> . 2004;16:859-63. [PMID: 15316409]                                         | Does not report relevant prevalence or risk measures     |
| Guyader D, Jacquelinet C, Moirand R, Turlin B, Mendler MH, Chaperon J, et al. Noninvasive prediction of fibrosis in C282Y homozygous hemochromatosis. <i>Gastroenterology</i> . 1998;115:929-36. [PMID: 9753496]                                             | Not the correct population                               |
| Hultcrantz R, Gabrielsson N. Patients with persistent elevation of aminotransferases: investigation with ultrasonography, radionuclide imaging and liver biopsy. <i>J Intern Med</i> . 1993;233:7-12. [PMID: 8429291]                                        | Not relevant outcomes                                    |
| Jeffrey GP, Adams PC. Pitfalls in the genetic diagnosis of hereditary hemochromatosis. <i>Genet Test</i> . 2000;4:143-6. [PMID: 10953953]                                                                                                                    | Editorial                                                |
| Jordan JM. Arthritis in hemochromatosis or iron storage disease. <i>Curr Opin Rheumatol</i> . 2004;16:62-6. [PMID: 14673391]                                                                                                                                 | Review article                                           |
| Jorquera F, Dominguez A, Diaz-Golpe V, Espinel J, Munoz F, Herrera A, et al. C282Y and H63D mutations of the haemochromatosis gene in patients with iron overload. <i>Rev Esp Enferm Dig</i> . 2001;93:293-302. [PMID: 11488107]                             | Does not report relevant prevalence or risk measures     |
| Koefoed P, Dalhoff K, Dissing J, Kramer I, Milman N, Pedersen P, et al. HFE mutations and hemochromatosis in Danish patients admitted for HFE genotyping. <i>Scand J Clin Lab Invest</i> . 2002;62:527-35. [PMID: 12512743]                                  | Quality                                                  |
| Krawczak M, Cooper DN, Schmidtke J. Estimating the efficacy and efficiency of cascade genetic screening. <i>Am J Hum Genet</i> . 2001;69:361-70. [PMID: 11431707]                                                                                            | Does not include primary results                         |
| Li J, Zhu Y, Singal DP. HFE gene mutations in patients with rheumatoid arthritis. <i>J Rheumatol</i> . 2000;27:2074-7. [PMID: 10990216]                                                                                                                      | Quality                                                  |
| Mathews JL, Williams HJ. Arthritis in hereditary hemochromatosis. <i>Arthritis Rheum</i> . 1987;30:1137-41. [PMID: 3675659]                                                                                                                                  | Not HFE                                                  |
| McCune CA, Ravine D, Worwood M, Jackson HA, Evans HM, Hutton D. Screening for hereditary haemochromatosis within families and beyond. <i>Lancet</i> . 2003;362:1897-8. [PMID: 14667749]                                                                      | Does not report relevant prevalence or risk measures     |
| Nassar BA, Zayed EM, Title LM, O'Neill BJ, Bata IR, Kirkland SA, et al. Relation of HFE gene mutations, high iron stores and early onset coronary artery disease. <i>Can J Cardiol</i> . 1998;14:215-20. [PMID: 9520858]                                     | Quality                                                  |
| Nelson RL, Persky V, Davis F, Becker E. Risk of disease in siblings of patients with hereditary hemochromatosis. <i>Digestion</i> . 2001;64:120-4. [PMID: 11684826]                                                                                          | Quality                                                  |
| Olynyk J, Hall P, Ahern M, Kwiatek R, Mackinnon M. Screening for genetic haemochromatosis in a rheumatology clinic. <i>Aust N Z J Med</i> . 1994;24:22-5. [PMID: 8002853]                                                                                    | Quality                                                  |

Continued on following page

**Appendix Table 6—Continued**

| Study Citation                                                                                                                                                                                                                                                                         | Reason for Exclusion                                     |
|----------------------------------------------------------------------------------------------------------------------------------------------------------------------------------------------------------------------------------------------------------------------------------------|----------------------------------------------------------|
| Panajotopoulos N, Piperno A, Conte D, Mandelli C, Cesana M, Mercuriali F, et al. HLA typing in 67 Italian patients with idiopathic hemochromatosis and their relatives. <i>Tissue Antigens</i> . 1989;33:431-6. [PMID: 2734773]                                                        | Not the correct population                               |
| Peterlin B, Globocnik Petrovic M, Makuc J, Hawlina M, Petrovic D. A hemochromatosis-causing mutation C282Y is a risk factor for proliferative diabetic retinopathy in Caucasians with type 2 diabetes. <i>J Hum Genet</i> . 2003;48:646-9. [PMID: 14618419]                            | Not the correct population                               |
| Piperno A, D'Alba R, Fargion S, Roffi L, Sampietro M, Parma S, et al. Liver iron concentration in chronic viral hepatitis: a study of 98 patients. <i>Eur J Gastroenterol Hepatol</i> . 1995;7:1203-8. [PMID: 8789313]                                                                 | Not the correct population                               |
| Rasmussen ML, Folsom AR, Catellier DJ, Tsai MY, Garg U, Eckfeldt JH. A prospective study of coronary heart disease and the hemochromatosis gene (HFE) C282Y mutation: the Atherosclerosis Risk in Communities (ARIC) study. <i>Atherosclerosis</i> . 2001;154:739-46. [PMID: 11257277] | Does not report relevant prevalence or risk measures     |
| Roberts AG, Whatley SD, Morgan RR, Worwood M, Elder GH. Increased frequency of the haemochromatosis Cys282Tyr mutation in sporadic porphyria cutanea tarda. <i>Lancet</i> . 1997;349:321-3. [PMID: 9024376]                                                                            | Does not meet our definition of clinical hemochromatosis |
| Rosenqvist M, Hultcrantz R. Prevalence of a haemochromatosis among men with clinically significant bradyarrhythmias. <i>Eur Heart J</i> . 1989;10:473-8. [PMID: 2788086]                                                                                                               | No HFE testing                                           |
| Sampietro M, Piperno A, Lupica L, Arosio C, Vergani A, Corbetta N, et al. High prevalence of the His63Asp HFE mutation in Italian patients with porphyria cutanea tarda. <i>Hepatology</i> . 1998;27:181-4. [PMID: 9425935]                                                            | Does not meet our definition of clinical hemochromatosis |
| Schmid H, Struppeler C, Braun GS, Kellner W, Kellner H. Ankle and hindfoot arthropathy in hereditary hemochromatosis. <i>J Rheumatol</i> . 2003;30:196-9. [PMID: 12508413]                                                                                                             | Not the correct population                               |
| Sham RL, Raubertas RF, Braggins C, Cappuccio J, Gallagher M, Phatak PD. Asymptomatic hemochromatosis subjects: genotypic and phenotypic profiles. <i>Blood</i> . 2000;96:3707-11. [PMID: 11090050]                                                                                     | Not the correct population                               |
| Shoaf EH Jr. Hemochromatosis discovered through blood donor screening for alanine aminotransferase. <i>N C Med J</i> . 1990;51:443-5. [PMID: 2234109]                                                                                                                                  | Case report                                              |
| Siezenga MA, Rasp E, Wijermans PW. Testing families with HFE-related hereditary haemochromatosis. <i>Neth J Med</i> . 2004;62:156-9. [PMID: 15366698]                                                                                                                                  | Case report                                              |
| Simon M, Alexandre JL, Bourel M, Le Marec B, Scordia C. Heredity of idiopathic hemochromatosis: a study of 106 families. <i>Clin Genet</i> . 1977;11:327-41. [PMID: 862210]                                                                                                            | Quality                                                  |
| Tannapfel A, Stolzel U, Kostler E, Melz S, Richter M, Keim V, et al. C282Y and H63D mutation of the hemochromatosis gene in German porphyria cutanea tarda patients. <i>Virchows Arch</i> . 2001;439:1-5. [PMID: 11499833]                                                             | Does not meet our definition of clinical hemochromatosis |
| Timms AE, Sathananthan R, Bradbury L, Athanasou NA, Wordsworth BP, Brown MA. Genetic testing for hemochromatosis in patients with chondrocalcinosis. <i>Ann Rheum Dis</i> . 2002;61:745-7. [PMID: 12117686]                                                                            | Quality                                                  |
