# Supplementary material
Source: HighWire-hosted journal article supplement (https://www.annals.org/content/suppl/2006/07/31/145.3.209)
Supplement: Whitlock_AT7_145-3-209-DC1-5.pdf [file Whitlock_AT7_145-3-209-DC1-5.pdf]

Appendix Table 7. Longitudinal Studies of Disease Development in C282Y Homozygotes\*

| Study, Year (Reference)    | Population                                                                                                                                                                     | Criteria/Sequence and Results for Screening†                                                                                                                                                                                                                                                                                                                                                                                                                                                                                             | Criteria and Results for Iron Overload†                                                                                                                                                                    | Definition and Results for Morbidity                                                                                                                                                                                                                                                                                            | Quality                                                                                                                                                                                                                                                                |
|----------------------------|--------------------------------------------------------------------------------------------------------------------------------------------------------------------------------|------------------------------------------------------------------------------------------------------------------------------------------------------------------------------------------------------------------------------------------------------------------------------------------------------------------------------------------------------------------------------------------------------------------------------------------------------------------------------------------------------------------------------------------|------------------------------------------------------------------------------------------------------------------------------------------------------------------------------------------------------------|---------------------------------------------------------------------------------------------------------------------------------------------------------------------------------------------------------------------------------------------------------------------------------------------------------------------------------|------------------------------------------------------------------------------------------------------------------------------------------------------------------------------------------------------------------------------------------------------------------------|
| Olynyk et al., 2004 (46)   | Retrospective examination of 3011 randomly selected participants (age 20–79 y) from Busselton, Australia, cohort genotyped in 1998<br>Available data from 1981, 1994, and 1998 | <i>HFE</i> genotype<br>16 of 3011 C282YY homozygotes, 4 previously diagnosed and undergoing TP (those 4 were excluded)<br>Serum available for 10 of 12 patients<br>Elevated iron measures<br>1981: 3 of 9<br>Median age: 30 y<br>1994: 9 of 10<br>Median age: 43 y<br>1998: 10 of 10<br>Median age: 47 y<br>SF level > 300 µg/L<br>1981: 5 of 10<br>1994: 5 of 10 (4 of 5 were same as 1981)<br>1998: 6 of 10                                                                                                                            | > 90 µmol/g<br>5 of 6 had biopsy in 1998<br>Possible iron overload<br>Men: 4 of 4 (calculated) with TS > 0.50 and SF level > 300 µg/L<br>Women: 2 of 6 (calculated) with TS > 0.45 and SF level > 200 µg/L | Fibrosis (6 had biopsy): 2 of 6<br>Cirrhosis: 1 of 6 (cirrhotic patient drank > 6 alcoholic drinks/day)<br>Diabetes: 1 patient at age 19 y; thought to be unrelated to HC<br>Arthralgia: 4 of 10                                                                                                                                | Good—potential for selective mortality bias, but effect appears to have been minimal because of reasonably complete follow-up of cohort (85%). Very small sample; not all patients were of the age at which disease expression would be expected (i.e., women ≥ 50 y). |
| Andersen et al., 2004 (47) | Retrospective cohort from Copenhagen Heart Study, 1976–2001; <i>n</i> = 9174<br>White persons > 99%<br>47% (9174 of 19 698) of original Copenhagen study sample                | <i>HFE</i> genotype C282Y:C282Y<br>23 of 9174<br>20 still alive<br>TS > 0.50 in 2001<br>Men: 5 of 7, women: 13 of 16<br>SF level > 250 µg/L in 2001<br>Men: 6 of 7<br>SF level > 200 µg/L in 2001<br>Women: 10 of 16<br>Iron measure progression (1976–2001)<br>Mean TS<br>Women<br>Mean age, 25 y: 0.50<br>Mean age, 85 y: 0.70<br>Men<br>Mean age, 35 y: 0.70<br>Mean age, 80 y: 0.80<br>Mean SF level<br>Women<br>Mean age, 25 y: 120 µg/L<br>Mean age, 85 y: 500 µg/L<br>Men<br>Mean age, 35 y: 800 µg/L<br>Mean age, 80 y: 400 µg/L | Possible iron overload<br>Men: TS > 0.50, SF level > 300 µg/L, and CE: 5 of 7 (calculated)<br>Women: TS > -0.45, SF level > 200 µg/L, and CE: 9 of 16 (calculated)<br>Liver biopsies not done              | Diabetes: 1 of 23 (4%)<br>Liver disease: 0 of 23 (0%) (Defined by AST level > 50 U/L; alkaline phosphatase level > 275 U/L; coagulation tests < 70%; bilirubin level > 17)<br>Clinical work-ups in 2001 for liver disease, hypogonadism, cardiomyopathy: 0 of 23<br>Work-up for arthralgias: 2 of 23<br>Subclinical HC: 1 of 23 | Fair—results may be compromised by selective mortality bias due to large attrition of the cohort. No liver biopsies to confirm disease expression or iron overload.                                                                                                    |

\* AST = aspartate aminotransferase; C282YY = C282Y/C282Y; HC = hemochromatosis; SF = serum ferritin; TP = therapeutic phlebotomy; TS = transferrin saturation.

† Criteria defined in Table 2.
