# Supplementary material
Source: HighWire-hosted journal article supplement (https://www.annals.org/content/suppl/2006/07/31/145.3.209)
Supplement: Whitlock_AT8_145-3-209-DC1-6.pdf [file Whitlock_AT8_145-3-209-DC1-6.pdf]

**Appendix Table 8. Genotype Screening Studies in Various Populations\***

| Study, Year (Reference)                                                                                     | Population                                                                                                                                  | C282Y:C282Y Frequency                                                              | T5† (Initial Test Unless Stated)                                                                                     | SF†                                                                                                                                     | Iron Overload                                                                                                                                                                   | Diabetes                                                                           | Elevated Liver Enzyme Levels                                                                                              | Hepatic Fibrosis or Cirrhosis                                                                                                                                   | Quality                                                                                                                                                               |
|-------------------------------------------------------------------------------------------------------------|---------------------------------------------------------------------------------------------------------------------------------------------|------------------------------------------------------------------------------------|----------------------------------------------------------------------------------------------------------------------|-----------------------------------------------------------------------------------------------------------------------------------------|---------------------------------------------------------------------------------------------------------------------------------------------------------------------------------|------------------------------------------------------------------------------------|---------------------------------------------------------------------------------------------------------------------------|-----------------------------------------------------------------------------------------------------------------------------------------------------------------|-----------------------------------------------------------------------------------------------------------------------------------------------------------------------|
| <b>Health clinics</b>                                                                                       |                                                                                                                                             |                                                                                    |                                                                                                                      |                                                                                                                                         |                                                                                                                                                                                 |                                                                                    |                                                                                                                           |                                                                                                                                                                 |                                                                                                                                                                       |
| Beutler et al., 2002a (32); Beutler et al., 2002b (48); Beutler et al., 2000 (49); Waalen et al., 2002 (50) | KP San Diego<br>n = 41 038<br>Mean age, 57 y<br>Non-Hispanic white persons: 77%<br>140 C282YY homozygotes from KP San Diego screening study | 152 of 41 038<br>3.7/1000                                                          | >0.50: men, 75%; women, 40%<br>Elevated overall: 57%<br>After exclusion of frequent blood donors: 76% men, 41% women | >250 µg/L: men, 76%<br>>200 µg/L: women, 54%<br>Elevated overall: 65%<br>After exclusion of frequent blood donors: men, 77%; women, 56% | NR<br>102 eligible (not previously treated)<br>54 completed treatment<br>13 of 54 (24%) had > 5 g iron removed                                                                  | C282YY: 5.6%<br>Non-C282YY: 8.4%                                                   | AST level > 40 U/L<br>C282YY: 8.2%<br>Non-C282YY: 3.8%                                                                    | NR                                                                                                                                                              | Good—excellent controls. Excluded previously identified C282Y homozygotes in determining prevalence of genotype and disease expression.                               |
| Deugnier et al., 2002 (51)                                                                                  | Brittany, France<br>n = 9396<br>35.8% men (deliberately weighted to include younger men)                                                    | 54 of 9396<br>5.7/1000                                                             | >0.55: men, 80%<br>>0.50: women, 41%<br>Elevated overall: 48%                                                        | >280 µg/L: men, 70%<br>>130 µg/L: women, 33%<br>Elevated overall: 40%                                                                   | NR                                                                                                                                                                              | Men<br>C282YY: 0%<br>Non-C282YY: 0.8%<br>Women<br>C282YY: 2.3%<br>Non-C282YY: 0.9% | Men<br>ALT level > 70 U/L<br>C282YY: 10%<br>Non-C282YY: 5%<br>Women<br>ALT level > 35 U/L<br>C282YY: 5%<br>Non-C282YY: 5% | Fair—not strictly population-based because overselected. Inclusion of younger men could minimize disease expression.                                            |                                                                                                                                                                       |
| <b>Population screening</b>                                                                                 |                                                                                                                                             |                                                                                    |                                                                                                                      |                                                                                                                                         |                                                                                                                                                                                 |                                                                                    |                                                                                                                           |                                                                                                                                                                 |                                                                                                                                                                       |
| Olynyk et al., 1999 (52)                                                                                    | Busselton, Australia<br>n = 3011, randomly selected<br>50% men<br>Predominately white persons<br>Age, 20–79 y                               | 16 of 3011<br>5.3/1000<br>4 of 16 previously diagnosed<br>12 new C282YY (5.3/1000) | >0.45: 93.8%<br>2nd measurement<br>> 0.45: 93.8%                                                                     | >300 µg/L: 50%<br>>300 µg/L in untreated persons: 58.3%                                                                                 | Liver biopsy: 7 of 12 (58%)<br>HII > 1.9: 4 of 7 (57.1%) of those having biopsy<br>33% of C282YY homozygotes<br>HIC > 20 µmol/g dry: 100% of those biopsied (7/7)<br>58% C282YY | NR                                                                                 | NR                                                                                                                        | Fibrosis: 29% of persons having biopsy (2 of 7)<br>Cirrhosis: 14% of persons having biopsy (1 of 7) (also had history of alcohol intake >60 g/d)<br>No controls | Good—considered confounders for liver disease. Excluded previously identified C282Y homozygotes.                                                                      |
| <b>Voter rolls</b>                                                                                          |                                                                                                                                             |                                                                                    |                                                                                                                      |                                                                                                                                         |                                                                                                                                                                                 |                                                                                    |                                                                                                                           |                                                                                                                                                                 |                                                                                                                                                                       |
| Burt et al., 1998 (53)                                                                                      | n = 1064 voters in New Zealand<br>39.8% men<br>Mean age: 50 y                                                                               | 5 of 1064<br>4.7/1000                                                              | > 0.55: 100%                                                                                                         | Second measurement:<br>>300 µg/L: men, 100%<br>>160 µg/L: women, 50%<br>Elevated overall: 60%                                           | Liver biopsy: 60%<br>HII > 1.9: 3 of 3 (100%) selected C282YY homozygotes<br>3 of 5 (60%) all C282YY homozygotes                                                                | NR                                                                                 | NR                                                                                                                        | NR                                                                                                                                                              | Fair—did not exclude previously identified C282Y homozygotes, so estimates of screening prevalence are less accurate. Did not consider confounders for liver disease. |
| <b>Employment screening</b>                                                                                 |                                                                                                                                             |                                                                                    |                                                                                                                      |                                                                                                                                         |                                                                                                                                                                                 |                                                                                    |                                                                                                                           |                                                                                                                                                                 |                                                                                                                                                                       |
| Distante et al., 1999 (54)                                                                                  | n = 505 hospital employees in Oslo, Norway<br>79% women<br>Mean age: 38 y                                                                   | 2 of 505<br>4/1000                                                                 | >0.50: 100%                                                                                                          | >200 µg/L: 100%                                                                                                                         | TP in 50%: 5.2 g of iron removed<br>1 of 1 with IO by TP<br>HIC: 47 µmol/g<br>Biopsy: 0 of 1<br>IO: 50% selected C282YY homozygotes<br>Total IO: 100%                           | NR                                                                                 | NR                                                                                                                        | NR                                                                                                                                                              | Good                                                                                                                                                                  |
| McDonnell et al., 1999 (55)                                                                                 | n = 1450 HMO employees in Springfield, Missouri<br>83% women<br>98% white<br>Mean age: 41 y                                                 | 6 of 1450<br>4.1/1000                                                              | >0.50: women, 2<br>>0.60: men, 2<br>Elevated overall: 67% of C282YY homozygotes                                      | >95th percentile for age and sex: 50% of C282YY homozygotes                                                                             | HII = 2.2:<br>1 of 1 by biopsy<br>1 of 2 by TP<br>2 of 3 (67%) of selected C282YY homozygotes<br>2 of 6 (33%) of all C282YY homozygotes                                         | NR                                                                                 | NR                                                                                                                        | Fibrosis: 0 of 1 (0%)                                                                                                                                           | Fair/good—some inconsistencies between data reported in text and figures/tables. Did not consider confounders for liver disease.                                      |

Appendix Table 8—Continued

| Study, Year (Reference)     | Population                                                                                                                                 | C282Y:C282Y Frequency                                                     | TS† (Initial Test Unless Stated)                                      | SF†                                                             | Iron Overload                                                                                                                                                                                                            | Diabetes                                   | Elevated Liver Enzyme Levels | Hepatic Fibrosis or Cirrhosis                                                                                                                                                                                           | Quality                                                                                                                                                                                                                                                                                                                                                                                                                                                                                                                                            |
|-----------------------------|--------------------------------------------------------------------------------------------------------------------------------------------|---------------------------------------------------------------------------|-----------------------------------------------------------------------|-----------------------------------------------------------------|--------------------------------------------------------------------------------------------------------------------------------------------------------------------------------------------------------------------------|--------------------------------------------|------------------------------|-------------------------------------------------------------------------------------------------------------------------------------------------------------------------------------------------------------------------|----------------------------------------------------------------------------------------------------------------------------------------------------------------------------------------------------------------------------------------------------------------------------------------------------------------------------------------------------------------------------------------------------------------------------------------------------------------------------------------------------------------------------------------------------|
| Delatycki et al., 2005 (56) | n = 11 307 workplace employees in Australia<br>47% men<br>63% northern European                                                            | 51 of 11 307 4 previously diagnosed 4.5/1000<br>47 new C282YY homozygotes | Criteria for elevation not given; 65% had "elevated" values           | NR                                                              | 6 recommended for testing; 4 had biopsy                                                                                                                                                                                  | NR                                         | NR                           | Fibrosis: 2 of 4 had biopsy<br>50% of selected C282YY homozygotes<br>4.3% (2 of 47) of all C282YY homozygotes                                                                                                           | Fair—did not exclude previously identified C282Y homozygotes, so estimates of screening prevalence are less accurate. Did not consider confounders for liver disease. Unclear criteria for iron overload.                                                                                                                                                                                                                                                                                                                                          |
| <b>Family studies</b>       |                                                                                                                                            |                                                                           |                                                                       |                                                                 |                                                                                                                                                                                                                          |                                            |                              |                                                                                                                                                                                                                         |                                                                                                                                                                                                                                                                                                                                                                                                                                                                                                                                                    |
| Barton et al., 1999 (57)    | n = 150 relatives of 61 probands in Alabama<br>52% women<br>100% white<br>Mean age: 46 y<br>1 patient < 18 y was C282YY homozygote         | 25/149<br>161/1000                                                        | > 0.50: women, 2<br>> 0.60: men, 2<br>Overall: 87.5%                  | > 300 µg/L (men)<br>> 200 µg/L (women)<br>Elevated overall: 96% | NR                                                                                                                                                                                                                       | 16%                                        | NR                           | 2/25 (8%)                                                                                                                                                                                                               | Fair—unable to determine how many tested family members were spouses.                                                                                                                                                                                                                                                                                                                                                                                                                                                                              |
| Powell et al., 2006 (58)    | 401 C282YY first-degree relatives of 259 probands with proven C282YY-associated HC<br>50% female<br>Mean age:<br>Men, 38 y;<br>Women, 44 y | ND                                                                        | Men: Mean, 72% (range, 12%–100%)<br>Women: Mean, 64% (range, 7%–100%) | Men: Median, 700 µg/L<br>Women: Median, 300 µg/L                | Hepatic stain ≥ 3+:<br>Men<br>Selected C282YY homozygotes: 82 of 111 (74%)<br>All C282YY homozygotes: 82 of 200 (41%)<br>Women<br>Selected C282YY homozygotes: 46 of 74 (62%)<br>All C282YY homozygotes: 46 of 201 (23%) | Men: 4 of 200 (2%)<br>Women: 7 of 201 (3%) | Men: 24%<br>Women: 7%        | Fibrosis or cirrhosis:<br>Men<br>Selected C282YY homozygotes: 32 of 111 (29%)<br>All C282YY homozygotes: 32 of 200 (16%)<br>Women<br>Selected C282YY homozygotes: 5 of 74 (7%)<br>All C282YY homozygotes: 5 of 201 (2%) | Fair—large sample with reasonably well-specified diagnostic and case criteria. Sample clearly was selected, but no information provided to judge how selective. May fairly represent family screening-detected, but no information given on number tested or whether some were omitted. Did not represent "asymptomatic" general population screening because all persons who underwent genotyping had some initial elevation in serum iron levels. Very selective group for treatment responsiveness; all those with alcohol intake were omitted. |

\* ALT = alanine aminotransferase; AST = aspartate aminotransferase; C282YY = C282Y/C282Y; HIC = hepatic iron content; HII = hepatic iron index; HMO = health maintenance organization; IO = iron overload; KP = Kaiser Permanente; ND = not determined; NR = not recorded; SF = serum ferritin; TP = therapeutic phlebotomy.

† In homozygotes.
