# Supplementary material
Source: HighWire-hosted journal article supplement (https://www.annals.org/content/suppl/2006/07/31/145.3.209)
Supplement: Whitlock_AT9_145-3-209-DC1-7.pdf [file Whitlock_AT9_145-3-209-DC1-7.pdf]

Appendix Table 9. Therapeutic Phlebotomy Studies for Key Question 2\*

| Study, Year (Reference)         | Setting and Study Design                                                             | Population                                                                                                                                                                                       | Inclusion Criteria                                                                                                                                                                                                                                                     | Control Group                                                                                                               | Follow-up                                                                                              | Treatment                                                                                                                                                                                                                                                                              | Measure and Results                                                                                                                                                                                                                                                                                                                                                                                                                                                                                                                                                                                                                                                                                                                                                                                                                                                                                                                                                                                                                                                                                                                                                                                                                                                                                                                                                                                                                     | Adverse Events | Quality |                         |   |   |            |   |    |            |   |   |            |   |    |            |     |    |            |       |      |      |      |   |   |   |    |   |    |   |    |   |    |   |    |   |    |   |    |    |           |
|---------------------------------|--------------------------------------------------------------------------------------|--------------------------------------------------------------------------------------------------------------------------------------------------------------------------------------------------|------------------------------------------------------------------------------------------------------------------------------------------------------------------------------------------------------------------------------------------------------------------------|-----------------------------------------------------------------------------------------------------------------------------|--------------------------------------------------------------------------------------------------------|----------------------------------------------------------------------------------------------------------------------------------------------------------------------------------------------------------------------------------------------------------------------------------------|-----------------------------------------------------------------------------------------------------------------------------------------------------------------------------------------------------------------------------------------------------------------------------------------------------------------------------------------------------------------------------------------------------------------------------------------------------------------------------------------------------------------------------------------------------------------------------------------------------------------------------------------------------------------------------------------------------------------------------------------------------------------------------------------------------------------------------------------------------------------------------------------------------------------------------------------------------------------------------------------------------------------------------------------------------------------------------------------------------------------------------------------------------------------------------------------------------------------------------------------------------------------------------------------------------------------------------------------------------------------------------------------------------------------------------------------|----------------|---------|-------------------------|---|---|------------|---|----|------------|---|---|------------|---|----|------------|-----|----|------------|-------|------|------|------|---|---|---|----|---|----|---|----|---|----|---|----|---|----|---|----|----|-----------|
| Adams et al., 1991 (25)         | Specialty clinic Canada<br>Retrospective case series                                 | n = 85<br>Probands: 48<br>Discovered family members: 37<br>Men: 53<br>Arthritis: 40<br>Diabetes: 18                                                                                              | Diagnosed between 1958 and 1989<br>Diagnosis was based on clinical history, physical examination, SF levels, and TS and was confirmed through liver biopsy<br>Patients with iron-loading anemias, transfusional iron overload, and dietary iron overload were excluded | Survival was compared against provincial life-table data matched for age and sex                                            | Mean: 8.1 (SD, 6.8) y<br>Analysis was censored at 20 y because only 5 patients were followed for >20 y | 500 mL blood/wk until SF level < 30 µg/L or patient became anemic<br>Mean number of treatments: 43 (SD, 51)<br>Treatment resumed if SF levels became elevated                                                                                                                          | Deaths: 17<br>Cumulative survival:<br>5 y: 87%<br>10 y: 81%<br>20 y: 71%<br>Expected survival: significantly decreased survival at all times except 1 y and >14 y<br>No significant difference between noncirrhotic patients and hypothetical cohort of age- and sex-matched patients<br>Adjusted RR for death:<br>Cirrhosis: 5.54<br>Arthritis: 0.24                                                                                                                                                                                                                                                                                                                                                                                                                                                                                                                                                                                                                                                                                                                                                                                                                                                                                                                                                                                                                                                                                   | NR             | Fair    |                         |   |   |            |   |    |            |   |   |            |   |    |            |     |    |            |       |      |      |      |   |   |   |    |   |    |   |    |   |    |   |    |   |    |   |    |    |           |
| Bomford and Williams, 1976 (59) | Specialty clinic United Kingdom<br>Case series                                       | n = 111<br>Patients diagnosed through routine clinical practice who received treatment<br>Treated: 85<br>Untreated controls: 26                                                                  | Excluded persons with secondary iron overload. Diagnosis made "by clinical, biochemical and where possible histological criteria"                                                                                                                                      | 26 untreated historical controls who were not comparable to treated patients                                                | 1937 to approximately 1975                                                                             | 600 mL was removed weekly until hemoglobin ≤ 10 g/dL and serum iron level decreased to <10 µmol/L<br>Biopsy usually repeated after completion of treatment.<br>Treatment resumed if chelatable body iron levels increased to >1000 µg/kg body weight<br>79 of 85 completed full course | Diabetes: 56<br>Improved: 16 of 56<br>Worsened: 7 of 56<br>New cases: 3<br>Liver histology: 75<br>Improved: 5 of 75<br>No definite change: 68 of 75<br>Worsened: 2 of 75                                                                                                                                                                                                                                                                                                                                                                                                                                                                                                                                                                                                                                                                                                                                                                                                                                                                                                                                                                                                                                                                                                                                                                                                                                                                | NR             | Fair    |                         |   |   |            |   |    |            |   |   |            |   |    |            |     |    |            |       |      |      |      |   |   |   |    |   |    |   |    |   |    |   |    |   |    |   |    |    |           |
| Niederer et al., 1996 (60)      | Diagnosed patients from primary care clinics<br>Germany<br>Retrospective case series | n = 251<br>Mean age: 45.7 (SD, 10.8) y<br>Men: 224<br>Noncirrhotic: 109<br>Asymptomatic: 41<br>Family screening: 15<br>Cirrhotic: 142<br>Asymptomatic: 7<br>Diabetic: 120<br>2 lost to follow-up | Diagnosed between 1947 and 1991<br>Patients were diagnosed on basis of clinical features and biochemical test results: liver function, serum iron, TS, and SF.<br>Confirmed by liver biopsy                                                                            | Expected deaths were calculated for a German normal population that was age- and sex-matched for time period of observation | Mean: 14.1 (SD, 6.8) y                                                                                 | From 1979 on, patients were treated 1–2 times/wk by TP (500 mL) until SF levels were normal<br>185 patients with documented iron depletion received mean of 84.8 (SD, 4.4) treatments to achieve depletion<br>All patients underwent 4–12 TPs per y after depletion                    | Cumulative survival:<br>5 y: 93%<br>10 y: 77%<br>20 y: 55%<br>30 y: 20%<br>Significantly reduced compared with expected survival in matched population<br>Liver iron concentration at diagnosis per fibrosis stage:<br><table border="1"> <thead> <tr> <th>Stage</th> <th>Pts, n</th> <th>Liver Iron (SD), µmol/g</th> </tr> </thead> <tbody> <tr> <td>0</td> <td>7</td> <td>11.6 (1.8)</td> </tr> <tr> <td>1</td> <td>10</td> <td>13.9 (1.1)</td> </tr> <tr> <td>2</td> <td>9</td> <td>16.9 (1.4)</td> </tr> <tr> <td>3</td> <td>15</td> <td>22.4 (2.0)</td> </tr> <tr> <td>All</td> <td>41</td> <td>16.1 (1.6)</td> </tr> </tbody> </table><br>Changes in fibrosis stage after iron depletion:<br><table border="1"> <thead> <tr> <th>Stage</th> <th>I, n</th> <th>W, n</th> <th>U, n</th> </tr> </thead> <tbody> <tr> <td>0</td> <td>0</td> <td>1</td> <td>20</td> </tr> <tr> <td>1</td> <td>10</td> <td>1</td> <td>21</td> </tr> <tr> <td>2</td> <td>20</td> <td>0</td> <td>19</td> </tr> <tr> <td>3</td> <td>12</td> <td>0</td> <td>81</td> </tr> </tbody> </table><br>Sign/Symptom<br>AD, % I, % U, % W, %<br>Weakness/lethargy 80 55 40 6<br>Abdominal pain 56 68 29 1<br>Arthralgia 45 30 50 20<br>Elevated AST or ALT level 81 73 25 2<br>Pigmentation 68 68 32 0<br>Loss of potency (163 men) 40 19 69 12<br>Electrocardiographic changes 35 34 61 5<br>Diabetes mellitus 44 41 53 6<br>Impaired glucose tolerance 15 37 56 7 | Stage          | Pts, n  | Liver Iron (SD), µmol/g | 0 | 7 | 11.6 (1.8) | 1 | 10 | 13.9 (1.1) | 2 | 9 | 16.9 (1.4) | 3 | 15 | 22.4 (2.0) | All | 41 | 16.1 (1.6) | Stage | I, n | W, n | U, n | 0 | 0 | 1 | 20 | 1 | 10 | 1 | 21 | 2 | 20 | 0 | 19 | 3 | 12 | 0 | 81 | NR | Fair-poor |
| Stage                           | Pts, n                                                                               | Liver Iron (SD), µmol/g                                                                                                                                                                          |                                                                                                                                                                                                                                                                        |                                                                                                                             |                                                                                                        |                                                                                                                                                                                                                                                                                        |                                                                                                                                                                                                                                                                                                                                                                                                                                                                                                                                                                                                                                                                                                                                                                                                                                                                                                                                                                                                                                                                                                                                                                                                                                                                                                                                                                                                                                         |                |         |                         |   |   |            |   |    |            |   |   |            |   |    |            |     |    |            |       |      |      |      |   |   |   |    |   |    |   |    |   |    |   |    |   |    |   |    |    |           |
| 0                               | 7                                                                                    | 11.6 (1.8)                                                                                                                                                                                       |                                                                                                                                                                                                                                                                        |                                                                                                                             |                                                                                                        |                                                                                                                                                                                                                                                                                        |                                                                                                                                                                                                                                                                                                                                                                                                                                                                                                                                                                                                                                                                                                                                                                                                                                                                                                                                                                                                                                                                                                                                                                                                                                                                                                                                                                                                                                         |                |         |                         |   |   |            |   |    |            |   |   |            |   |    |            |     |    |            |       |      |      |      |   |   |   |    |   |    |   |    |   |    |   |    |   |    |   |    |    |           |
| 1                               | 10                                                                                   | 13.9 (1.1)                                                                                                                                                                                       |                                                                                                                                                                                                                                                                        |                                                                                                                             |                                                                                                        |                                                                                                                                                                                                                                                                                        |                                                                                                                                                                                                                                                                                                                                                                                                                                                                                                                                                                                                                                                                                                                                                                                                                                                                                                                                                                                                                                                                                                                                                                                                                                                                                                                                                                                                                                         |                |         |                         |   |   |            |   |    |            |   |   |            |   |    |            |     |    |            |       |      |      |      |   |   |   |    |   |    |   |    |   |    |   |    |   |    |   |    |    |           |
| 2                               | 9                                                                                    | 16.9 (1.4)                                                                                                                                                                                       |                                                                                                                                                                                                                                                                        |                                                                                                                             |                                                                                                        |                                                                                                                                                                                                                                                                                        |                                                                                                                                                                                                                                                                                                                                                                                                                                                                                                                                                                                                                                                                                                                                                                                                                                                                                                                                                                                                                                                                                                                                                                                                                                                                                                                                                                                                                                         |                |         |                         |   |   |            |   |    |            |   |   |            |   |    |            |     |    |            |       |      |      |      |   |   |   |    |   |    |   |    |   |    |   |    |   |    |   |    |    |           |
| 3                               | 15                                                                                   | 22.4 (2.0)                                                                                                                                                                                       |                                                                                                                                                                                                                                                                        |                                                                                                                             |                                                                                                        |                                                                                                                                                                                                                                                                                        |                                                                                                                                                                                                                                                                                                                                                                                                                                                                                                                                                                                                                                                                                                                                                                                                                                                                                                                                                                                                                                                                                                                                                                                                                                                                                                                                                                                                                                         |                |         |                         |   |   |            |   |    |            |   |   |            |   |    |            |     |    |            |       |      |      |      |   |   |   |    |   |    |   |    |   |    |   |    |   |    |   |    |    |           |
| All                             | 41                                                                                   | 16.1 (1.6)                                                                                                                                                                                       |                                                                                                                                                                                                                                                                        |                                                                                                                             |                                                                                                        |                                                                                                                                                                                                                                                                                        |                                                                                                                                                                                                                                                                                                                                                                                                                                                                                                                                                                                                                                                                                                                                                                                                                                                                                                                                                                                                                                                                                                                                                                                                                                                                                                                                                                                                                                         |                |         |                         |   |   |            |   |    |            |   |   |            |   |    |            |     |    |            |       |      |      |      |   |   |   |    |   |    |   |    |   |    |   |    |   |    |   |    |    |           |
| Stage                           | I, n                                                                                 | W, n                                                                                                                                                                                             | U, n                                                                                                                                                                                                                                                                   |                                                                                                                             |                                                                                                        |                                                                                                                                                                                                                                                                                        |                                                                                                                                                                                                                                                                                                                                                                                                                                                                                                                                                                                                                                                                                                                                                                                                                                                                                                                                                                                                                                                                                                                                                                                                                                                                                                                                                                                                                                         |                |         |                         |   |   |            |   |    |            |   |   |            |   |    |            |     |    |            |       |      |      |      |   |   |   |    |   |    |   |    |   |    |   |    |   |    |   |    |    |           |
| 0                               | 0                                                                                    | 1                                                                                                                                                                                                | 20                                                                                                                                                                                                                                                                     |                                                                                                                             |                                                                                                        |                                                                                                                                                                                                                                                                                        |                                                                                                                                                                                                                                                                                                                                                                                                                                                                                                                                                                                                                                                                                                                                                                                                                                                                                                                                                                                                                                                                                                                                                                                                                                                                                                                                                                                                                                         |                |         |                         |   |   |            |   |    |            |   |   |            |   |    |            |     |    |            |       |      |      |      |   |   |   |    |   |    |   |    |   |    |   |    |   |    |   |    |    |           |
| 1                               | 10                                                                                   | 1                                                                                                                                                                                                | 21                                                                                                                                                                                                                                                                     |                                                                                                                             |                                                                                                        |                                                                                                                                                                                                                                                                                        |                                                                                                                                                                                                                                                                                                                                                                                                                                                                                                                                                                                                                                                                                                                                                                                                                                                                                                                                                                                                                                                                                                                                                                                                                                                                                                                                                                                                                                         |                |         |                         |   |   |            |   |    |            |   |   |            |   |    |            |     |    |            |       |      |      |      |   |   |   |    |   |    |   |    |   |    |   |    |   |    |   |    |    |           |
| 2                               | 20                                                                                   | 0                                                                                                                                                                                                | 19                                                                                                                                                                                                                                                                     |                                                                                                                             |                                                                                                        |                                                                                                                                                                                                                                                                                        |                                                                                                                                                                                                                                                                                                                                                                                                                                                                                                                                                                                                                                                                                                                                                                                                                                                                                                                                                                                                                                                                                                                                                                                                                                                                                                                                                                                                                                         |                |         |                         |   |   |            |   |    |            |   |   |            |   |    |            |     |    |            |       |      |      |      |   |   |   |    |   |    |   |    |   |    |   |    |   |    |   |    |    |           |
| 3                               | 12                                                                                   | 0                                                                                                                                                                                                | 81                                                                                                                                                                                                                                                                     |                                                                                                                             |                                                                                                        |                                                                                                                                                                                                                                                                                        |                                                                                                                                                                                                                                                                                                                                                                                                                                                                                                                                                                                                                                                                                                                                                                                                                                                                                                                                                                                                                                                                                                                                                                                                                                                                                                                                                                                                                                         |                |         |                         |   |   |            |   |    |            |   |   |            |   |    |            |     |    |            |       |      |      |      |   |   |   |    |   |    |   |    |   |    |   |    |   |    |   |    |    |           |

Appendix Table 9—Continued

| Study, Year (Reference)     | Setting and Study Design                                                                                                                                                                                                                                                                                                   | Population                                                                                                                                                                                                                               | Inclusion Criteria                                                                                                                                                                                                                                                                                                                                                                              | Control Group | Follow-up      | Treatment                                                                                           | Measure and Results                                                                                                                                                                                                                                                                                                                                                                                                                                                                                                                                                                                                                                                                                                                                                                                                                                                                                                                                                                                                                                                                                                                                     | Adverse Events | Quality   |         |         |         |             |            |            |            |             |           |            |                          |            |           |            |               |            |            |          |                  |            |          |           |            |            |            |           |                |            |            |           |                                                                                                                                                                                                                                                                                                             |      |
|-----------------------------|----------------------------------------------------------------------------------------------------------------------------------------------------------------------------------------------------------------------------------------------------------------------------------------------------------------------------|------------------------------------------------------------------------------------------------------------------------------------------------------------------------------------------------------------------------------------------|-------------------------------------------------------------------------------------------------------------------------------------------------------------------------------------------------------------------------------------------------------------------------------------------------------------------------------------------------------------------------------------------------|---------------|----------------|-----------------------------------------------------------------------------------------------------|---------------------------------------------------------------------------------------------------------------------------------------------------------------------------------------------------------------------------------------------------------------------------------------------------------------------------------------------------------------------------------------------------------------------------------------------------------------------------------------------------------------------------------------------------------------------------------------------------------------------------------------------------------------------------------------------------------------------------------------------------------------------------------------------------------------------------------------------------------------------------------------------------------------------------------------------------------------------------------------------------------------------------------------------------------------------------------------------------------------------------------------------------------|----------------|-----------|---------|---------|---------|-------------|------------|------------|------------|-------------|-----------|------------|--------------------------|------------|-----------|------------|---------------|------------|------------|----------|------------------|------------|----------|-----------|------------|------------|------------|-----------|----------------|------------|------------|-----------|-------------------------------------------------------------------------------------------------------------------------------------------------------------------------------------------------------------------------------------------------------------------------------------------------------------|------|
| McDonnell et al., 1999 (55) | Population-based mailings to all known patients with HC and organizations with access to patients with HC in United States, Canada, Australia, and northern Europe. Patients from ≥17 countries, including United States (84%), Australia (6%), United Kingdom (6%), and Canada (4%). Retrospective cross-sectional study. | n = 2851 patients (80% of all surveys mailed). White: 99%. Men: 62%. Diagnosis made 1990 or later: 70%. Diagnosis made before 1980: 6%.                                                                                                  | Led to diagnosis: 35% from symptoms related to hereditary HC, 45% from routine or ancillary laboratory test, 20% from diagnosis of family member. 56% diagnosed by primary care physician. 67% initially diagnosed with alternate condition to explain symptoms. Mean age at symptom onset: 41 (SD, 14) y. Mean age when sought treatment: 43 (SD, 14) y. Mean age at diagnosis: 50 (SD, 13) y. | None          | NA             | Location at which patient had TP: physician's office/hospital (73%), blood bank (25%), home (0.1%). | Some or all symptoms improved with therapy: 86%. Mean time for improvement: 39 (SD, 67) wk. New symptoms developed despite treatment: 33%.<br><br><table border="1"> <thead> <tr> <th>Sign/Symptom</th> <th>RS, n (%)</th> <th>I, n %†</th> <th>W, n %‡</th> </tr> </thead> <tbody> <tr> <td>Fatigue</td> <td>1296 (45.5)</td> <td>705 (54.4)</td> <td>223 (17.2)</td> </tr> <tr> <td>Joint pain</td> <td>1241 (43.5)</td> <td>115 (9.2)</td> <td>422 (34.0)</td> </tr> <tr> <td>Impotence/loss of libido</td> <td>735 (25.8)</td> <td>93 (12.7)</td> <td>204 (27.8)</td> </tr> <tr> <td>Skin bronzing</td> <td>733 (25.7)</td> <td>431 (58.8)</td> <td>30 (4.1)</td> </tr> <tr> <td>Heart fluttering</td> <td>679 (23.8)</td> <td>42 (6.2)</td> <td>69 (10.1)</td> </tr> <tr> <td>Depression</td> <td>592 (20.8)</td> <td>242 (40.8)</td> <td>61 (10.3)</td> </tr> <tr> <td>Abdominal pain</td> <td>578 (20.3)</td> <td>129 (22.3)</td> <td>69 (11.9)</td> </tr> </tbody> </table> <p>Compared with NHANES II and III, similar proportion of patients reported arthritis, liver or gallbladder disease, and extreme fatigue as general population.</p> | Sign/Symptom   | RS, n (%) | I, n %† | W, n %‡ | Fatigue | 1296 (45.5) | 705 (54.4) | 223 (17.2) | Joint pain | 1241 (43.5) | 115 (9.2) | 422 (34.0) | Impotence/loss of libido | 735 (25.8) | 93 (12.7) | 204 (27.8) | Skin bronzing | 733 (25.7) | 431 (58.8) | 30 (4.1) | Heart fluttering | 679 (23.8) | 42 (6.2) | 69 (10.1) | Depression | 592 (20.8) | 242 (40.8) | 61 (10.3) | Abdominal pain | 578 (20.3) | 129 (22.3) | 69 (11.9) | 65% of patients with symptoms said the benefit of treatment outweighed difficulties. 20% found the process routine and expressed indifference. 12% expressed a negative attitude toward TP that they attributed to poor venous access, time involved, dissatisfaction that the removed blood was discarded. | Fair |
| Sign/Symptom                | RS, n (%)                                                                                                                                                                                                                                                                                                                  | I, n %†                                                                                                                                                                                                                                  | W, n %‡                                                                                                                                                                                                                                                                                                                                                                                         |               |                |                                                                                                     |                                                                                                                                                                                                                                                                                                                                                                                                                                                                                                                                                                                                                                                                                                                                                                                                                                                                                                                                                                                                                                                                                                                                                         |                |           |         |         |         |             |            |            |            |             |           |            |                          |            |           |            |               |            |            |          |                  |            |          |           |            |            |            |           |                |            |            |           |                                                                                                                                                                                                                                                                                                             |      |
| Fatigue                     | 1296 (45.5)                                                                                                                                                                                                                                                                                                                | 705 (54.4)                                                                                                                                                                                                                               | 223 (17.2)                                                                                                                                                                                                                                                                                                                                                                                      |               |                |                                                                                                     |                                                                                                                                                                                                                                                                                                                                                                                                                                                                                                                                                                                                                                                                                                                                                                                                                                                                                                                                                                                                                                                                                                                                                         |                |           |         |         |         |             |            |            |            |             |           |            |                          |            |           |            |               |            |            |          |                  |            |          |           |            |            |            |           |                |            |            |           |                                                                                                                                                                                                                                                                                                             |      |
| Joint pain                  | 1241 (43.5)                                                                                                                                                                                                                                                                                                                | 115 (9.2)                                                                                                                                                                                                                                | 422 (34.0)                                                                                                                                                                                                                                                                                                                                                                                      |               |                |                                                                                                     |                                                                                                                                                                                                                                                                                                                                                                                                                                                                                                                                                                                                                                                                                                                                                                                                                                                                                                                                                                                                                                                                                                                                                         |                |           |         |         |         |             |            |            |            |             |           |            |                          |            |           |            |               |            |            |          |                  |            |          |           |            |            |            |           |                |            |            |           |                                                                                                                                                                                                                                                                                                             |      |
| Impotence/loss of libido    | 735 (25.8)                                                                                                                                                                                                                                                                                                                 | 93 (12.7)                                                                                                                                                                                                                                | 204 (27.8)                                                                                                                                                                                                                                                                                                                                                                                      |               |                |                                                                                                     |                                                                                                                                                                                                                                                                                                                                                                                                                                                                                                                                                                                                                                                                                                                                                                                                                                                                                                                                                                                                                                                                                                                                                         |                |           |         |         |         |             |            |            |            |             |           |            |                          |            |           |            |               |            |            |          |                  |            |          |           |            |            |            |           |                |            |            |           |                                                                                                                                                                                                                                                                                                             |      |
| Skin bronzing               | 733 (25.7)                                                                                                                                                                                                                                                                                                                 | 431 (58.8)                                                                                                                                                                                                                               | 30 (4.1)                                                                                                                                                                                                                                                                                                                                                                                        |               |                |                                                                                                     |                                                                                                                                                                                                                                                                                                                                                                                                                                                                                                                                                                                                                                                                                                                                                                                                                                                                                                                                                                                                                                                                                                                                                         |                |           |         |         |         |             |            |            |            |             |           |            |                          |            |           |            |               |            |            |          |                  |            |          |           |            |            |            |           |                |            |            |           |                                                                                                                                                                                                                                                                                                             |      |
| Heart fluttering            | 679 (23.8)                                                                                                                                                                                                                                                                                                                 | 42 (6.2)                                                                                                                                                                                                                                 | 69 (10.1)                                                                                                                                                                                                                                                                                                                                                                                       |               |                |                                                                                                     |                                                                                                                                                                                                                                                                                                                                                                                                                                                                                                                                                                                                                                                                                                                                                                                                                                                                                                                                                                                                                                                                                                                                                         |                |           |         |         |         |             |            |            |            |             |           |            |                          |            |           |            |               |            |            |          |                  |            |          |           |            |            |            |           |                |            |            |           |                                                                                                                                                                                                                                                                                                             |      |
| Depression                  | 592 (20.8)                                                                                                                                                                                                                                                                                                                 | 242 (40.8)                                                                                                                                                                                                                               | 61 (10.3)                                                                                                                                                                                                                                                                                                                                                                                       |               |                |                                                                                                     |                                                                                                                                                                                                                                                                                                                                                                                                                                                                                                                                                                                                                                                                                                                                                                                                                                                                                                                                                                                                                                                                                                                                                         |                |           |         |         |         |             |            |            |            |             |           |            |                          |            |           |            |               |            |            |          |                  |            |          |           |            |            |            |           |                |            |            |           |                                                                                                                                                                                                                                                                                                             |      |
| Abdominal pain              | 578 (20.3)                                                                                                                                                                                                                                                                                                                 | 129 (22.3)                                                                                                                                                                                                                               | 69 (11.9)                                                                                                                                                                                                                                                                                                                                                                                       |               |                |                                                                                                     |                                                                                                                                                                                                                                                                                                                                                                                                                                                                                                                                                                                                                                                                                                                                                                                                                                                                                                                                                                                                                                                                                                                                                         |                |           |         |         |         |             |            |            |            |             |           |            |                          |            |           |            |               |            |            |          |                  |            |          |           |            |            |            |           |                |            |            |           |                                                                                                                                                                                                                                                                                                             |      |
| Powell et al., 2006 (58)    | First-degree relatives of C282Y homozygotes with clinical HC or screened population with elevated serum iron measures. Australia. Prospective cross-sectional study.                                                                                                                                                       | n = 672. 401 from family screening; 271 from primary care screening. Underwent biopsy after TP: 25. Patients were those with "uncertainty about cirrhosis or persistently abnormal liver enzyme levels". White: predominantly. Men: 53%. | Homozygotes identified from family or primary care screening. Those with high alcohol intake were not analyzed for changes in cirrhosis/fibrosis (n = 5).                                                                                                                                                                                                                                       | None          | Up to 24 years | TP until TS < 0.15 or SF level ≤ 20 µg/L.                                                           | NR because of high alcohol intake: 5 of 25 (20%). Improved fibrosis score: 19 of 20 (95%). No change in cirrhosis: 1 of 20 (5%).                                                                                                                                                                                                                                                                                                                                                                                                                                                                                                                                                                                                                                                                                                                                                                                                                                                                                                                                                                                                                        | NR             | Fair      |         |         |         |             |            |            |            |             |           |            |                          |            |           |            |               |            |            |          |                  |            |          |           |            |            |            |           |                |            |            |           |                                                                                                                                                                                                                                                                                                             |      |

\* AD = at diagnosis; ALT = alanine aminotransferase; AST = aspartate aminotransferase; HC = hemochromatosis; I = improved; NA = not available; NHANES = National Health and Nutrition Examination Survey; NR = not reported; Pt = patient; RR = relative risk; RS = reported symptom; SF = serum ferritin; TP = therapeutic phlebotomy; TS = transferrin saturation; U = unchanged; W = worse.

† Improved with therapy.

‡ Worsened despite therapy.
