# Supplementary material
Source: HighWire-hosted journal article supplement (https://www.annals.org/content/suppl/2006/07/31/145.3.209)
Supplement: Whitlock_AT10_145-3-209-DC1-8.pdf [file Whitlock_AT10_145-3-209-DC1-8.pdf]

Appendix Table 10. Studies of High-Risk Groups for C282Y Homozygosity or Hereditary Hemochromatosis\*

| Study, Year (Reference)                   | Setting, Time Frame, Country                                                                                                                                                                                                             | Study Design                                                                                                                         | Sample                                                                                                                                                                                                                                                                                                                                                                                                                                                                                                                                                                                        | Risk Group Definition                                                                                                  | Inclusion and Exclusion Criteria                                                                                                                                                       | Population                                                                                                                                                                                                                                                                                                                         | Initial Screening Sequence                                                                              | Definition of Clinical HC                                                                                                                                                                                                                                                                                                                                                                | Diagnostic Criteria                                            | Results                                                                                                                                                                                                                                                                                                                                                                                                                                                                                                                                                                                                                                                                                                                                                                                                                                                                                                                                                                                                                                                                                                                                                                                                                                                                                                                                                                                                                                                                                                                                                                                                                                           | Quality   |              |             |              |             |              |               |       |      |      |      |      |       |       |       |      |      |      |      |      |      |       |     |     |      |     |       |      |       |     |     |     |     |     |      |       |     |   |     |   |      |      |       |     |   |     |   |      |      |       |              |             |                   |              |               |              |      |    |     |      |      |                                     |              |    |            |             |              |                 |     |    |     |      |      |                                           |          |    |            |             |              |      |
|-------------------------------------------|------------------------------------------------------------------------------------------------------------------------------------------------------------------------------------------------------------------------------------------|--------------------------------------------------------------------------------------------------------------------------------------|-----------------------------------------------------------------------------------------------------------------------------------------------------------------------------------------------------------------------------------------------------------------------------------------------------------------------------------------------------------------------------------------------------------------------------------------------------------------------------------------------------------------------------------------------------------------------------------------------|------------------------------------------------------------------------------------------------------------------------|----------------------------------------------------------------------------------------------------------------------------------------------------------------------------------------|------------------------------------------------------------------------------------------------------------------------------------------------------------------------------------------------------------------------------------------------------------------------------------------------------------------------------------|---------------------------------------------------------------------------------------------------------|------------------------------------------------------------------------------------------------------------------------------------------------------------------------------------------------------------------------------------------------------------------------------------------------------------------------------------------------------------------------------------------|----------------------------------------------------------------|---------------------------------------------------------------------------------------------------------------------------------------------------------------------------------------------------------------------------------------------------------------------------------------------------------------------------------------------------------------------------------------------------------------------------------------------------------------------------------------------------------------------------------------------------------------------------------------------------------------------------------------------------------------------------------------------------------------------------------------------------------------------------------------------------------------------------------------------------------------------------------------------------------------------------------------------------------------------------------------------------------------------------------------------------------------------------------------------------------------------------------------------------------------------------------------------------------------------------------------------------------------------------------------------------------------------------------------------------------------------------------------------------------------------------------------------------------------------------------------------------------------------------------------------------------------------------------------------------------------------------------------------------|-----------|--------------|-------------|--------------|-------------|--------------|---------------|-------|------|------|------|------|-------|-------|-------|------|------|------|------|------|------|-------|-----|-----|------|-----|-------|------|-------|-----|-----|-----|-----|-----|------|-------|-----|---|-----|---|------|------|-------|-----|---|-----|---|------|------|-------|--------------|-------------|-------------------|--------------|---------------|--------------|------|----|-----|------|------|-------------------------------------|--------------|----|------------|-------------|--------------|-----------------|-----|----|-----|------|------|-------------------------------------------|----------|----|------------|-------------|--------------|------|
| <b>Family setting</b>                     |                                                                                                                                                                                                                                          |                                                                                                                                      |                                                                                                                                                                                                                                                                                                                                                                                                                                                                                                                                                                                               |                                                                                                                        |                                                                                                                                                                                        |                                                                                                                                                                                                                                                                                                                                    |                                                                                                         |                                                                                                                                                                                                                                                                                                                                                                                          |                                                                |                                                                                                                                                                                                                                                                                                                                                                                                                                                                                                                                                                                                                                                                                                                                                                                                                                                                                                                                                                                                                                                                                                                                                                                                                                                                                                                                                                                                                                                                                                                                                                                                                                                   |           |              |             |              |             |              |               |       |      |      |      |      |       |       |       |      |      |      |      |      |      |       |     |     |      |     |       |      |       |     |     |     |     |     |      |       |     |   |     |   |      |      |       |     |   |     |   |      |      |       |              |             |                   |              |               |              |      |    |     |      |      |                                     |              |    |            |             |              |                 |     |    |     |      |      |                                           |          |    |            |             |              |      |
| Barton et al., 1999 (57)                  | Southern Iron Disorder Center and Brookwood Medical Center<br>No dates reported<br>United States                                                                                                                                         | Cross-sectional study: to compare phenotyping and HFE genotyping for diagnosis of hereditary HC in 150 family members of 61 probands | Probands diagnosed during routine medical care delivery from June 1996 to June 1998 (Genetic testing not used to diagnose probands before family members were identified—only 73.8% were C282Y/C282Y homozygotes)<br>150 family members of 61 probands (did not report what percentage of total)                                                                                                                                                                                                                                                                                              | Relatives of people with iron overload (probands: 16% had cirrhosis and 5% had diabetes attributable to iron overload) | Inclusion: willingness of probands and a family member to participate<br>Exclusions: NR                                                                                                | 72 (48%) men<br>78 (52%) women<br>Mean age, 46 (SD, 15) y<br>(All were adults except one 11-year-old)<br>94 were 1st-degree relatives; 56 were 2nd-degree non-blood relatives                                                                                                                                                      | Simultaneous genetic testing for HFE alleles C282Y and H63D; phenotype testing using TS; SF measurement | Phenotype definition: elevated fasting TS on ≥ 2 occasions without other known causes (>0.60 [men] and >0.50 [women])<br>Iron overload: elevated SF level (>300 μg/L [men] and >200 μg/L [women]), increased hepatic iron content determined by using hepatic biopsy, or iron >4 g (mobilized by TP)<br>No genetic criteria used<br>Hepatic cirrhosis and diabetes criteria not reported | HC phenotype: presence of elevated TS or iron overload or both | 1st- and 2nd-degree relatives, C282Y/C282Y homozygotes: 25 of 112 (calculated)<br>C282Y/C282Y homozygotes, n/n (%):<br>Siblings: 14/42 (33)<br>Parents: 3/16 (19)<br>Offspring: 5/36 (14)<br>Other blood relatives: 3/18 (16)<br>22 of 61 probands: blood relative with hereditary HC (36%); all were C282Y/C282Y<br>Phenotype, n/n (%):<br>First-degree relatives: 30/94 (31.9)<br>Non-first-degree relatives: 4/56 (7.1)                                                                                                                                                                                                                                                                                                                                                                                                                                                                                                                                                                                                                                                                                                                                                                                                                                                                                                                                                                                                                                                                                                                                                                                                                        | Good/fair |              |             |              |             |              |               |       |      |      |      |      |       |       |       |      |      |      |      |      |      |       |     |     |      |     |       |      |       |     |     |     |     |     |      |       |     |   |     |   |      |      |       |     |   |     |   |      |      |       |              |             |                   |              |               |              |      |    |     |      |      |                                     |              |    |            |             |              |                 |     |    |     |      |      |                                           |          |    |            |             |              |      |
| <b>Other targeted screening</b>           |                                                                                                                                                                                                                                          |                                                                                                                                      |                                                                                                                                                                                                                                                                                                                                                                                                                                                                                                                                                                                               |                                                                                                                        |                                                                                                                                                                                        |                                                                                                                                                                                                                                                                                                                                    |                                                                                                         |                                                                                                                                                                                                                                                                                                                                                                                          |                                                                |                                                                                                                                                                                                                                                                                                                                                                                                                                                                                                                                                                                                                                                                                                                                                                                                                                                                                                                                                                                                                                                                                                                                                                                                                                                                                                                                                                                                                                                                                                                                                                                                                                                   |           |              |             |              |             |              |               |       |      |      |      |      |       |       |       |      |      |      |      |      |      |       |     |     |      |     |       |      |       |     |     |     |     |     |      |       |     |   |     |   |      |      |       |     |   |     |   |      |      |       |              |             |                   |              |               |              |      |    |     |      |      |                                     |              |    |            |             |              |                 |     |    |     |      |      |                                           |          |    |            |             |              |      |
| Cadet et al., 2003 (61)                   | Multiple settings: primary care patients were recruited from 3 Oxfordshire practices, and secondary care patients were recruited from patients attending specialist clinics at Amiens University Hospital<br>No dates reported<br>France | Cohort study: to determine the optimal means of identifying patients with undiagnosed hereditary HC using HFE genotype or phenotype  | Primary care: 4022 consultations, during which 169 patients were identified with an index symptom (diabetes, AR, unexplained fatigue, abdominal pain, liver disease, abnormal LFT results, impotency, premature amenorrhea, or cardiac arrhythmia), of whom 88 were age 25–70 y and offered a genetic test for HC; 60 patients were tested<br>Secondary care: Several groups of patients attending specialty clinics at a hospital<br>Rheumatology clinics: 221 rheumatoid factor-negative patients with OS or AR<br>Endocrinology clinics: 121 diabetic patients from 1 endocrine department | Patients with presenting conditions possibly related to HC                                                             | Case-patients: Exclusions: families or patient previously diagnosed with hereditary HC<br>Controls: Inclusion: age >18 y<br>Living in Picardy<br>Attended a free health checkup clinic | Case-patients: OS n = 159<br>Sex: NR<br>Age: 64 (SD, 12) y<br>AR n = 62<br>Sex: NR<br>Age: 61.3 (SD, 13.9) y<br>Diabetes n = 121<br>Women: n = 42<br>Men: n = 79<br>Age: 54.8 (SD, 8.3) y<br>F/A n = 227<br>Women: n = 144<br>Men: n = 83<br>Age: 58.3 (SD, 15.6) y<br>Controls: n = 991 (random sample of 2337)<br>Women: n = 483 | HFE C283Y and H63D mutations, serum iron, SF                                                            | NA                                                                                                                                                                                                                                                                                                                                                                                       | NA                                                             | <table border="1"> <thead> <tr> <th>Genot</th> <th>HV (n = 991)</th> <th>PC (n = 60)</th> <th>OS (n = 159)</th> <th>AR (n = 62)</th> <th>DM (n = 121)</th> <th>F/A (n = 227)</th> </tr> </thead> <tbody> <tr> <td>HH/CC</td> <td>60.9</td> <td>68.3</td> <td>56.0</td> <td>59.7</td> <td>42.1‡</td> <td>44.9‡</td> </tr> <tr> <td>HD/CC</td> <td>26.4</td> <td>23.3</td> <td>29.0</td> <td>25.8</td> <td>24.0</td> <td>21.6</td> </tr> <tr> <td>HH/CY</td> <td>6.8</td> <td>5.0</td> <td>10.0</td> <td>8.0</td> <td>14.9§</td> <td>10.6</td> </tr> <tr> <td>DD/CC</td> <td>2.7</td> <td>3.3</td> <td>2.5</td> <td>6.5</td> <td>5.0</td> <td>9.3‡</td> </tr> <tr> <td>HD/CY</td> <td>2.9</td> <td>0</td> <td>1.9</td> <td>0</td> <td>8.3‡</td> <td>7.9§</td> </tr> <tr> <td>HH/YY</td> <td>0.2</td> <td>0</td> <td>0.6</td> <td>0</td> <td>5.8‡</td> <td>5.7‡</td> </tr> </tbody> </table><br><table border="1"> <thead> <tr> <th>Pheno</th> <th>HV (n = 991)</th> <th>PC (n = 60)</th> <th>OS + AR (n = 221)</th> <th>DM (n = 121)</th> <th>F/A (n = 227)</th> </tr> </thead> <tbody> <tr> <td>TS &gt; 0.40, %</td> <td>29.6</td> <td>NR</td> <td>4.1</td> <td>87.6</td> <td>30.8</td> </tr> <tr> <td>Pts w/ TS &gt;0.40 who are YY, n/n (%)</td> <td>2/293 (0.07)</td> <td>NR</td> <td>1/9 (11.1)</td> <td>7/106 (6.6)</td> <td>13/70 (18.6)</td> </tr> <tr> <td>SF &gt;300 μg/L, %</td> <td>5.8</td> <td>NR</td> <td>4.1</td> <td>46.3</td> <td>33.0</td> </tr> <tr> <td>Pts with SF &gt;300 μg/L who are YY, n/n (%)</td> <td>0/57 (0)</td> <td>NR</td> <td>1/9 (11.1)</td> <td>6/56 (10.7)</td> <td>13/75 (17.3)</td> </tr> </tbody> </table> | Genot     | HV (n = 991) | PC (n = 60) | OS (n = 159) | AR (n = 62) | DM (n = 121) | F/A (n = 227) | HH/CC | 60.9 | 68.3 | 56.0 | 59.7 | 42.1‡ | 44.9‡ | HD/CC | 26.4 | 23.3 | 29.0 | 25.8 | 24.0 | 21.6 | HH/CY | 6.8 | 5.0 | 10.0 | 8.0 | 14.9§ | 10.6 | DD/CC | 2.7 | 3.3 | 2.5 | 6.5 | 5.0 | 9.3‡ | HD/CY | 2.9 | 0 | 1.9 | 0 | 8.3‡ | 7.9§ | HH/YY | 0.2 | 0 | 0.6 | 0 | 5.8‡ | 5.7‡ | Pheno | HV (n = 991) | PC (n = 60) | OS + AR (n = 221) | DM (n = 121) | F/A (n = 227) | TS > 0.40, % | 29.6 | NR | 4.1 | 87.6 | 30.8 | Pts w/ TS >0.40 who are YY, n/n (%) | 2/293 (0.07) | NR | 1/9 (11.1) | 7/106 (6.6) | 13/70 (18.6) | SF >300 μg/L, % | 5.8 | NR | 4.1 | 46.3 | 33.0 | Pts with SF >300 μg/L who are YY, n/n (%) | 0/57 (0) | NR | 1/9 (11.1) | 6/56 (10.7) | 13/75 (17.3) | Fair |
| Genot                                     | HV (n = 991)                                                                                                                                                                                                                             | PC (n = 60)                                                                                                                          | OS (n = 159)                                                                                                                                                                                                                                                                                                                                                                                                                                                                                                                                                                                  | AR (n = 62)                                                                                                            | DM (n = 121)                                                                                                                                                                           | F/A (n = 227)                                                                                                                                                                                                                                                                                                                      |                                                                                                         |                                                                                                                                                                                                                                                                                                                                                                                          |                                                                |                                                                                                                                                                                                                                                                                                                                                                                                                                                                                                                                                                                                                                                                                                                                                                                                                                                                                                                                                                                                                                                                                                                                                                                                                                                                                                                                                                                                                                                                                                                                                                                                                                                   |           |              |             |              |             |              |               |       |      |      |      |      |       |       |       |      |      |      |      |      |      |       |     |     |      |     |       |      |       |     |     |     |     |     |      |       |     |   |     |   |      |      |       |     |   |     |   |      |      |       |              |             |                   |              |               |              |      |    |     |      |      |                                     |              |    |            |             |              |                 |     |    |     |      |      |                                           |          |    |            |             |              |      |
| HH/CC                                     | 60.9                                                                                                                                                                                                                                     | 68.3                                                                                                                                 | 56.0                                                                                                                                                                                                                                                                                                                                                                                                                                                                                                                                                                                          | 59.7                                                                                                                   | 42.1‡                                                                                                                                                                                  | 44.9‡                                                                                                                                                                                                                                                                                                                              |                                                                                                         |                                                                                                                                                                                                                                                                                                                                                                                          |                                                                |                                                                                                                                                                                                                                                                                                                                                                                                                                                                                                                                                                                                                                                                                                                                                                                                                                                                                                                                                                                                                                                                                                                                                                                                                                                                                                                                                                                                                                                                                                                                                                                                                                                   |           |              |             |              |             |              |               |       |      |      |      |      |       |       |       |      |      |      |      |      |      |       |     |     |      |     |       |      |       |     |     |     |     |     |      |       |     |   |     |   |      |      |       |     |   |     |   |      |      |       |              |             |                   |              |               |              |      |    |     |      |      |                                     |              |    |            |             |              |                 |     |    |     |      |      |                                           |          |    |            |             |              |      |
| HD/CC                                     | 26.4                                                                                                                                                                                                                                     | 23.3                                                                                                                                 | 29.0                                                                                                                                                                                                                                                                                                                                                                                                                                                                                                                                                                                          | 25.8                                                                                                                   | 24.0                                                                                                                                                                                   | 21.6                                                                                                                                                                                                                                                                                                                               |                                                                                                         |                                                                                                                                                                                                                                                                                                                                                                                          |                                                                |                                                                                                                                                                                                                                                                                                                                                                                                                                                                                                                                                                                                                                                                                                                                                                                                                                                                                                                                                                                                                                                                                                                                                                                                                                                                                                                                                                                                                                                                                                                                                                                                                                                   |           |              |             |              |             |              |               |       |      |      |      |      |       |       |       |      |      |      |      |      |      |       |     |     |      |     |       |      |       |     |     |     |     |     |      |       |     |   |     |   |      |      |       |     |   |     |   |      |      |       |              |             |                   |              |               |              |      |    |     |      |      |                                     |              |    |            |             |              |                 |     |    |     |      |      |                                           |          |    |            |             |              |      |
| HH/CY                                     | 6.8                                                                                                                                                                                                                                      | 5.0                                                                                                                                  | 10.0                                                                                                                                                                                                                                                                                                                                                                                                                                                                                                                                                                                          | 8.0                                                                                                                    | 14.9§                                                                                                                                                                                  | 10.6                                                                                                                                                                                                                                                                                                                               |                                                                                                         |                                                                                                                                                                                                                                                                                                                                                                                          |                                                                |                                                                                                                                                                                                                                                                                                                                                                                                                                                                                                                                                                                                                                                                                                                                                                                                                                                                                                                                                                                                                                                                                                                                                                                                                                                                                                                                                                                                                                                                                                                                                                                                                                                   |           |              |             |              |             |              |               |       |      |      |      |      |       |       |       |      |      |      |      |      |      |       |     |     |      |     |       |      |       |     |     |     |     |     |      |       |     |   |     |   |      |      |       |     |   |     |   |      |      |       |              |             |                   |              |               |              |      |    |     |      |      |                                     |              |    |            |             |              |                 |     |    |     |      |      |                                           |          |    |            |             |              |      |
| DD/CC                                     | 2.7                                                                                                                                                                                                                                      | 3.3                                                                                                                                  | 2.5                                                                                                                                                                                                                                                                                                                                                                                                                                                                                                                                                                                           | 6.5                                                                                                                    | 5.0                                                                                                                                                                                    | 9.3‡                                                                                                                                                                                                                                                                                                                               |                                                                                                         |                                                                                                                                                                                                                                                                                                                                                                                          |                                                                |                                                                                                                                                                                                                                                                                                                                                                                                                                                                                                                                                                                                                                                                                                                                                                                                                                                                                                                                                                                                                                                                                                                                                                                                                                                                                                                                                                                                                                                                                                                                                                                                                                                   |           |              |             |              |             |              |               |       |      |      |      |      |       |       |       |      |      |      |      |      |      |       |     |     |      |     |       |      |       |     |     |     |     |     |      |       |     |   |     |   |      |      |       |     |   |     |   |      |      |       |              |             |                   |              |               |              |      |    |     |      |      |                                     |              |    |            |             |              |                 |     |    |     |      |      |                                           |          |    |            |             |              |      |
| HD/CY                                     | 2.9                                                                                                                                                                                                                                      | 0                                                                                                                                    | 1.9                                                                                                                                                                                                                                                                                                                                                                                                                                                                                                                                                                                           | 0                                                                                                                      | 8.3‡                                                                                                                                                                                   | 7.9§                                                                                                                                                                                                                                                                                                                               |                                                                                                         |                                                                                                                                                                                                                                                                                                                                                                                          |                                                                |                                                                                                                                                                                                                                                                                                                                                                                                                                                                                                                                                                                                                                                                                                                                                                                                                                                                                                                                                                                                                                                                                                                                                                                                                                                                                                                                                                                                                                                                                                                                                                                                                                                   |           |              |             |              |             |              |               |       |      |      |      |      |       |       |       |      |      |      |      |      |      |       |     |     |      |     |       |      |       |     |     |     |     |     |      |       |     |   |     |   |      |      |       |     |   |     |   |      |      |       |              |             |                   |              |               |              |      |    |     |      |      |                                     |              |    |            |             |              |                 |     |    |     |      |      |                                           |          |    |            |             |              |      |
| HH/YY                                     | 0.2                                                                                                                                                                                                                                      | 0                                                                                                                                    | 0.6                                                                                                                                                                                                                                                                                                                                                                                                                                                                                                                                                                                           | 0                                                                                                                      | 5.8‡                                                                                                                                                                                   | 5.7‡                                                                                                                                                                                                                                                                                                                               |                                                                                                         |                                                                                                                                                                                                                                                                                                                                                                                          |                                                                |                                                                                                                                                                                                                                                                                                                                                                                                                                                                                                                                                                                                                                                                                                                                                                                                                                                                                                                                                                                                                                                                                                                                                                                                                                                                                                                                                                                                                                                                                                                                                                                                                                                   |           |              |             |              |             |              |               |       |      |      |      |      |       |       |       |      |      |      |      |      |      |       |     |     |      |     |       |      |       |     |     |     |     |     |      |       |     |   |     |   |      |      |       |     |   |     |   |      |      |       |              |             |                   |              |               |              |      |    |     |      |      |                                     |              |    |            |             |              |                 |     |    |     |      |      |                                           |          |    |            |             |              |      |
| Pheno                                     | HV (n = 991)                                                                                                                                                                                                                             | PC (n = 60)                                                                                                                          | OS + AR (n = 221)                                                                                                                                                                                                                                                                                                                                                                                                                                                                                                                                                                             | DM (n = 121)                                                                                                           | F/A (n = 227)                                                                                                                                                                          |                                                                                                                                                                                                                                                                                                                                    |                                                                                                         |                                                                                                                                                                                                                                                                                                                                                                                          |                                                                |                                                                                                                                                                                                                                                                                                                                                                                                                                                                                                                                                                                                                                                                                                                                                                                                                                                                                                                                                                                                                                                                                                                                                                                                                                                                                                                                                                                                                                                                                                                                                                                                                                                   |           |              |             |              |             |              |               |       |      |      |      |      |       |       |       |      |      |      |      |      |      |       |     |     |      |     |       |      |       |     |     |     |     |     |      |       |     |   |     |   |      |      |       |     |   |     |   |      |      |       |              |             |                   |              |               |              |      |    |     |      |      |                                     |              |    |            |             |              |                 |     |    |     |      |      |                                           |          |    |            |             |              |      |
| TS > 0.40, %                              | 29.6                                                                                                                                                                                                                                     | NR                                                                                                                                   | 4.1                                                                                                                                                                                                                                                                                                                                                                                                                                                                                                                                                                                           | 87.6                                                                                                                   | 30.8                                                                                                                                                                                   |                                                                                                                                                                                                                                                                                                                                    |                                                                                                         |                                                                                                                                                                                                                                                                                                                                                                                          |                                                                |                                                                                                                                                                                                                                                                                                                                                                                                                                                                                                                                                                                                                                                                                                                                                                                                                                                                                                                                                                                                                                                                                                                                                                                                                                                                                                                                                                                                                                                                                                                                                                                                                                                   |           |              |             |              |             |              |               |       |      |      |      |      |       |       |       |      |      |      |      |      |      |       |     |     |      |     |       |      |       |     |     |     |     |     |      |       |     |   |     |   |      |      |       |     |   |     |   |      |      |       |              |             |                   |              |               |              |      |    |     |      |      |                                     |              |    |            |             |              |                 |     |    |     |      |      |                                           |          |    |            |             |              |      |
| Pts w/ TS >0.40 who are YY, n/n (%)       | 2/293 (0.07)                                                                                                                                                                                                                             | NR                                                                                                                                   | 1/9 (11.1)                                                                                                                                                                                                                                                                                                                                                                                                                                                                                                                                                                                    | 7/106 (6.6)                                                                                                            | 13/70 (18.6)                                                                                                                                                                           |                                                                                                                                                                                                                                                                                                                                    |                                                                                                         |                                                                                                                                                                                                                                                                                                                                                                                          |                                                                |                                                                                                                                                                                                                                                                                                                                                                                                                                                                                                                                                                                                                                                                                                                                                                                                                                                                                                                                                                                                                                                                                                                                                                                                                                                                                                                                                                                                                                                                                                                                                                                                                                                   |           |              |             |              |             |              |               |       |      |      |      |      |       |       |       |      |      |      |      |      |      |       |     |     |      |     |       |      |       |     |     |     |     |     |      |       |     |   |     |   |      |      |       |     |   |     |   |      |      |       |              |             |                   |              |               |              |      |    |     |      |      |                                     |              |    |            |             |              |                 |     |    |     |      |      |                                           |          |    |            |             |              |      |
| SF >300 μg/L, %                           | 5.8                                                                                                                                                                                                                                      | NR                                                                                                                                   | 4.1                                                                                                                                                                                                                                                                                                                                                                                                                                                                                                                                                                                           | 46.3                                                                                                                   | 33.0                                                                                                                                                                                   |                                                                                                                                                                                                                                                                                                                                    |                                                                                                         |                                                                                                                                                                                                                                                                                                                                                                                          |                                                                |                                                                                                                                                                                                                                                                                                                                                                                                                                                                                                                                                                                                                                                                                                                                                                                                                                                                                                                                                                                                                                                                                                                                                                                                                                                                                                                                                                                                                                                                                                                                                                                                                                                   |           |              |             |              |             |              |               |       |      |      |      |      |       |       |       |      |      |      |      |      |      |       |     |     |      |     |       |      |       |     |     |     |     |     |      |       |     |   |     |   |      |      |       |     |   |     |   |      |      |       |              |             |                   |              |               |              |      |    |     |      |      |                                     |              |    |            |             |              |                 |     |    |     |      |      |                                           |          |    |            |             |              |      |
| Pts with SF >300 μg/L who are YY, n/n (%) | 0/57 (0)                                                                                                                                                                                                                                 | NR                                                                                                                                   | 1/9 (11.1)                                                                                                                                                                                                                                                                                                                                                                                                                                                                                                                                                                                    | 6/56 (10.7)                                                                                                            | 13/75 (17.3)                                                                                                                                                                           |                                                                                                                                                                                                                                                                                                                                    |                                                                                                         |                                                                                                                                                                                                                                                                                                                                                                                          |                                                                |                                                                                                                                                                                                                                                                                                                                                                                                                                                                                                                                                                                                                                                                                                                                                                                                                                                                                                                                                                                                                                                                                                                                                                                                                                                                                                                                                                                                                                                                                                                                                                                                                                                   |           |              |             |              |             |              |               |       |      |      |      |      |       |       |       |      |      |      |      |      |      |       |     |     |      |     |       |      |       |     |     |     |     |     |      |       |     |   |     |   |      |      |       |     |   |     |   |      |      |       |              |             |                   |              |               |              |      |    |     |      |      |                                     |              |    |            |             |              |                 |     |    |     |      |      |                                           |          |    |            |             |              |      |

Appendix Table 10—Continued

| Study, Year (Reference)    | Setting, Time Frame, Country                                                                    | Study Design                                                                                                                                            | Sample                                                                                                                                                                                      | Risk Group Definition                                                                                                                                                                                                   | Inclusion and Exclusion Criteria                                                                                                                | Population                                                                                                                                                                                                                                                            | Initial Screening Sequence                                                                                                                                                                                                                                                                                       | Definition of Clinical HC  | Diagnostic Criteria                                                                                                                             | Results                                                                                                                                                                                                                                                                                                                                                                                                                                                                                                                                                                                                                                                                                                                                                                                                                                                                                                                                                                                                  | Quality |
|----------------------------|-------------------------------------------------------------------------------------------------|---------------------------------------------------------------------------------------------------------------------------------------------------------|---------------------------------------------------------------------------------------------------------------------------------------------------------------------------------------------|-------------------------------------------------------------------------------------------------------------------------------------------------------------------------------------------------------------------------|-------------------------------------------------------------------------------------------------------------------------------------------------|-----------------------------------------------------------------------------------------------------------------------------------------------------------------------------------------------------------------------------------------------------------------------|------------------------------------------------------------------------------------------------------------------------------------------------------------------------------------------------------------------------------------------------------------------------------------------------------------------|----------------------------|-------------------------------------------------------------------------------------------------------------------------------------------------|----------------------------------------------------------------------------------------------------------------------------------------------------------------------------------------------------------------------------------------------------------------------------------------------------------------------------------------------------------------------------------------------------------------------------------------------------------------------------------------------------------------------------------------------------------------------------------------------------------------------------------------------------------------------------------------------------------------------------------------------------------------------------------------------------------------------------------------------------------------------------------------------------------------------------------------------------------------------------------------------------------|---------|
|                            |                                                                                                 |                                                                                                                                                         | (including those with unstable diabetes)<br>Internal medicine clinics: 227 patients with chronic fatigue and AR<br>Controls: recruited from 2337 persons >18 y from health appraisal center |                                                                                                                                                                                                                         |                                                                                                                                                 | Men: <i>n</i> = 508<br>Age: 42.5 (SD, 14.9) y<br>OS based on radiographic analysis; AR based on clinical diagnosis<br>Diabetes divided into 3 groups: type 1, type 2, and could not be classified<br>F/A defined by referral to internal medicine for chronic problem |                                                                                                                                                                                                                                                                                                                  |                            |                                                                                                                                                 |                                                                                                                                                                                                                                                                                                                                                                                                                                                                                                                                                                                                                                                                                                                                                                                                                                                                                                                                                                                                          |         |
| Deugnier et al., 2002 (51) | Men and women attending Health Appraisal Centres from September 1998 to December 2000<br>France | Cross-sectional study                                                                                                                                   | Men: age 25–40 y<br>Women: age 35–50 y                                                                                                                                                      | Family history of iron excess<br>Chronic fatigue<br>Increased ALT levels                                                                                                                                                | Included: Attending Health Appraisal Centres; meeting age criteria<br>Those who declined genotyping (4%) had no personal history of iron excess | <i>n</i> = 9396 (96% of total population)<br>Men: <i>n</i> = 3367<br>Women: <i>n</i> = 6029                                                                                                                                                                           | Questionnaire: age, sex, BMI, awareness of a family relative regularly having TS for iron excess, personal history of blood donation, chronic fatigue, chronic distal AR, diabetes<br>HFE C282Y mutation testing, and if C282Y homozygote<br>Fasting serum iron status (iron, TS, and SF) and genetic counseling | HFE C282Y mutation testing | NA                                                                                                                                              | C282Y homozygotes by family history of iron excess, <i>n/n</i> (%):<br>Men<br>Family history: 3/83 (3.6) (calculated)<br>No family history: 7/3904 (0.2) (calculated)<br>Women<br>Family history: 12/16 (75) (calculated)<br>No family history: 21/175 (12) (calculated)<br><hr/> C282Y homozygotes, <i>n/n</i> (%)<br>All participants: 54/9396 (0.006)<br>Men: 10/3367 (0.003)<br>Women: 44/6029 (0.007)<br><hr/> C282Y homozygotes by presence of chronic fatigue, <i>n/n</i> (%):<br>Men<br>Chronic fatigue: 7/828 (0.85) (calculated)<br>No chronic fatigue: 3/2180 (0.14) (calculated)<br>Women<br>Chronic fatigue: 12/2253 (0.53) (calculated)<br>No chronic fatigue: 28/3361 (0.83) (calculated)<br>C282Y homozygotes by increased ALT level, <i>n/n</i> (%):<br>Men<br>ALT level increased: 1/176 (0.57) (calculated)<br>ALT level not increased: 9/3181 (0.28) (calculated)<br>Women<br>ALT level increased: 3/322 (0.62) (calculated)<br>ALT level not increased: 42/5694 (0.74) (calculated) | Fair    |
| <b>CHD, CAD</b>            |                                                                                                 |                                                                                                                                                         |                                                                                                                                                                                             |                                                                                                                                                                                                                         |                                                                                                                                                 |                                                                                                                                                                                                                                                                       |                                                                                                                                                                                                                                                                                                                  |                            |                                                                                                                                                 |                                                                                                                                                                                                                                                                                                                                                                                                                                                                                                                                                                                                                                                                                                                                                                                                                                                                                                                                                                                                          |         |
| Waalén et al., 2002 (62)   | Health appraisal center in San Diego, California<br>May 1999–August 2001<br>United States       | Cross-sectional study: to examine the relationship between 2 HFE mutations (C282Y and H63D) and the prevalence of CHD in a large white adult population | <i>n</i> = 35 792<br>All white, non-Hispanic adult patients age ≥25 y who attended a health appraisal center between May 1999 and August 2001                                               | History of CHD, defined as “yes” to questions “Have you had a heart attack for which you were hospitalized for at least 3 days?” or “Do you have angina pectoris?” or an ICD-9 code of 410 or 412 in the medical record | Inclusion: white, non-Hispanic, age 25–98 y attending Health Appraisal Center of an HMO<br>46% gave consent for HFE mutation testing            | Men: <i>n</i> = 15 362<br>Women: <i>n</i> = 15 554<br>All participants were white, non-Hispanic                                                                                                                                                                       | 400-Item questionnaire supplemented with medical record review to ensure ascertainment of all CHD events<br>Serum iron, TS, and SF values<br>HFE C282Y and H63D mutations                                                                                                                                        | NA                         | TS > 0.55 (men) or >0.45 (women), SF level >250 μg/L (men) and >200 μg/L (women) were used to define elevated levels based on clinical criteria | C282Y/C282Y, <i>n/n</i> (%):<br>Men<br>All CHD: 3/1798 (0.17)<br>No CHD: 65/8540 (0.76)<br>Women<br>All CHD: 3/1074 (0.28)<br>No CHD: 65/9117 (0.71)                                                                                                                                                                                                                                                                                                                                                                                                                                                                                                                                                                                                                                                                                                                                                                                                                                                     | Good    |

Continued on following page

Appendix Table 10—Continued

| Study, Year (Reference)                               | Setting, Time Frame, Country                                                                                                  | Study Design                                                                                                                                                                 | Sample                                                                                                                                                                                                                                                                                                                                                                                                                                | Risk Group Definition                                                     | Inclusion and Exclusion Criteria                                                                                                                                                                                                                                      | Population                                                                                                                                                                                                                                                                                                                                                                                      | Initial Screening Sequence                                                                                                                                                                                                                                                                                                                                           | Definition of Clinical HC | Diagnostic Criteria | Results                                                                                                                                                                                                                                                                                                                                                          | Quality                                                    |                                                  |      |
|-------------------------------------------------------|-------------------------------------------------------------------------------------------------------------------------------|------------------------------------------------------------------------------------------------------------------------------------------------------------------------------|---------------------------------------------------------------------------------------------------------------------------------------------------------------------------------------------------------------------------------------------------------------------------------------------------------------------------------------------------------------------------------------------------------------------------------------|---------------------------------------------------------------------------|-----------------------------------------------------------------------------------------------------------------------------------------------------------------------------------------------------------------------------------------------------------------------|-------------------------------------------------------------------------------------------------------------------------------------------------------------------------------------------------------------------------------------------------------------------------------------------------------------------------------------------------------------------------------------------------|----------------------------------------------------------------------------------------------------------------------------------------------------------------------------------------------------------------------------------------------------------------------------------------------------------------------------------------------------------------------|---------------------------|---------------------|------------------------------------------------------------------------------------------------------------------------------------------------------------------------------------------------------------------------------------------------------------------------------------------------------------------------------------------------------------------|------------------------------------------------------------|--------------------------------------------------|------|
| <b>Liver disease clinics</b>                          |                                                                                                                               |                                                                                                                                                                              |                                                                                                                                                                                                                                                                                                                                                                                                                                       |                                                                           |                                                                                                                                                                                                                                                                       |                                                                                                                                                                                                                                                                                                                                                                                                 |                                                                                                                                                                                                                                                                                                                                                                      |                           |                     |                                                                                                                                                                                                                                                                                                                                                                  |                                                            |                                                  |      |
| Poullis et al., 2003 (63)<br>Moodie et al., 2002 (64) | Patients attending a liver clinic at a teaching district general hospital in south London 1997–2001<br>London, United Kingdom | Cross-sectional data: to examine the value of routine TS testing of new liver clinic attendees over a 5-y period in detecting previously unrecognized cases of hereditary HC | 667 outpatients referred for investigation of liver disease over 5 y<br>Afro-Caribbean/<br>African: ND<br>Asian: majority originated from the Indian subcontinent, but also included 2 Chinese persons and 4 Iranian persons<br>Mediterranean: families originated from Portugal and countries bordering the Mediterranean Sea<br>Northern European: ND<br>Celtic: parents or grandparents from Cornwall, Wales, Scotland, or Ireland | Outpatients referred to a liver clinic for investigation of liver disease | Exclusion: previous diagnosis of hereditary HC                                                                                                                                                                                                                        | <i>n</i> = 667<br>Age range, 17–83 y (median, 51 y)<br>European: 68.6% (Celtic, 38.4%; other, 30.2%); Asian, 10.7%; Afro-Caribbean, 9.7%; Mediterranean, 7.9%<br>Other, 3.1%<br>Previous diagnoses: hepatitis C, 28%; primary biliary cirrhosis, 6%; hepatitis B, 4%<br>Liver biopsy: <i>n</i> = 349<br>Previous diagnosis: 60% >30 units per week alcohol consumption, present or past history | Nonfasting TS; those with TS >0.45 or a liver biopsy had <i>HFE</i> genotyping<br>Indications for biopsy included C282Y homozygosity, C282Y/H63D compound heterozygosity, elevated TS (>0.60), unexplained parenchymal liver disease, persistently abnormal LFT results, and liver disease of known cause necessitating staging or assessment of disease progression | NA                        | TS cutoffs          | 11 of 156 (7.1%) patients with TS >0.45 were C282Y/C282Y<br>1 of 349 (0.03%) patients with liver disease who had liver biopsy were C282Y/C282Y<br>Prevalence of new cases of hereditary HC cases in patients of European origin attending a liver clinic, detected by phenotypic screening over a 5-y period, was 2.8% (12 of 458) (calculated) (Europeans only) | Fair                                                       |                                                  |      |
| <b>Arthritis</b>                                      |                                                                                                                               |                                                                                                                                                                              |                                                                                                                                                                                                                                                                                                                                                                                                                                       |                                                                           |                                                                                                                                                                                                                                                                       |                                                                                                                                                                                                                                                                                                                                                                                                 |                                                                                                                                                                                                                                                                                                                                                                      |                           |                     |                                                                                                                                                                                                                                                                                                                                                                  |                                                            |                                                  |      |
| Willis et al., 2002 (65)                              | Specimens of patients with arthritis from the DNA archive of NOAR<br>First diagnosed between 1989 and 1995<br>United Kingdom  | Case-control study; to determine the value of screening patients with inflammatory arthritis for hereditary HC-associated mutations in the <i>HFE</i> gene                   | Case-patients: unselected inflammatory arthritis population collected by NOAR; prevalence of the hereditary HC-associated <i>HFE</i> genotypes compared with that in a large sample from unaffected populations<br>Controls: 1000 individuals from the catchment area of the Norfolk and Norwich hospitals, a large subset of the area covered by NOAR                                                                                | People with inflammatory arthritis                                        | Case-patients: Inclusion: Sequential DNA samples from patients for whom adequate DNA samples remained and who were first diagnosed between 1989 and 1995; >1 swollen joint lasting for > 6 wk<br>Controls: Exclusions: Patients with HC and people with foreign names | Arthritis populations: <i>n</i> = 1000<br>Controls: 373 unaffected volunteers from screening trial and 541 patients undergoing full blood counts<br>Mean age, 54 y                                                                                                                                                                                                                              | <i>HFE</i> C282Y and H63D mutation testing                                                                                                                                                                                                                                                                                                                           | NA                        | NA                  | <b>Variable</b><br>Mean age, y<br>C282Y homozygotes, <i>n</i><br>Predicted frequency of C282Y homozygotes (95% CI)                                                                                                                                                                                                                                               | <b>Arthritic Patients</b><br>54<br>5<br>1 in 287 (190–403) | <b>Controls</b><br>54<br>5<br>1 in 236 (170–335) | Good |

Appendix Table 10—Continued

| Study, Year (Reference)    | Setting, Time Frame, Country                                                                                                                              | Study Design                                                                                                     | Sample | Risk Group Definition                                                                                       | Inclusion and Exclusion Criteria | Population                                                                                                                     | Initial Screening Sequence                                                                                                                                                                                                                                                                                                                                                                                                                                                                    | Definition of Clinical HC | Diagnostic Criteria | Results                                                                                                                     | Quality   |
|----------------------------|-----------------------------------------------------------------------------------------------------------------------------------------------------------|------------------------------------------------------------------------------------------------------------------|--------|-------------------------------------------------------------------------------------------------------------|----------------------------------|--------------------------------------------------------------------------------------------------------------------------------|-----------------------------------------------------------------------------------------------------------------------------------------------------------------------------------------------------------------------------------------------------------------------------------------------------------------------------------------------------------------------------------------------------------------------------------------------------------------------------------------------|---------------------------|---------------------|-----------------------------------------------------------------------------------------------------------------------------|-----------|
| CFS                        |                                                                                                                                                           |                                                                                                                  |        |                                                                                                             |                                  |                                                                                                                                |                                                                                                                                                                                                                                                                                                                                                                                                                                                                                               |                           |                     |                                                                                                                             |           |
| Swinkels et al., 2002 (66) | Department of General Internal Medicine of the University Medical Centre St. Radboud, Nijmegen, a Dutch tertiary CFS referral center 1992 The Netherlands | Cross-sectional study; to determine whether patients previously diagnosed as having CFS actually have primary HC | NR     | Patients fulfilling criteria for CFS<br>Patients had given permission to store serum for future CFS studies | NR                               | 88 self-referred patients previously diagnosed with CFS<br>Mean age, 40 y (range, 20–66 y)<br>Men: $n = 23$<br>Women: $n = 65$ | TS: elevated if $>0.40$ (women) and $>0.45$ (men)<br>All patients who could be located with elevated TS (15 of 19) were asked to provide a new fasting blood sample for a second TS and SF<br>Genotyping done if TS or SF levels were elevated (reference values: SF: 15–280 $\mu\text{g/L}$ [men], 6–80 $\mu\text{g/L}$ [premenopausal women], and 15–190 $\mu\text{g/L}$ [postmenopausal women])<br>Elevated TS: $n = 6$<br>Elevated SF level: $n = 2$<br>Elevated TS and SF level: $n = 0$ | NA                        | NR                  | None of the 8 patients with increased TS or increased SF levels were C282Y homozygotes or compound C282Y/H63D heterozygotes | Fair/poor |

\* ALT = alanine aminotransferase; AR = arthropathy; BMI = body mass index; CAD = coronary artery disease; CFS = chronic fatigue syndrome; CHD = coronary heart disease; DD/CC = H63D homozygous; DM = diabetes mellitus; F/A = fatigue and arthralgia; Geno = genotype; HC = hemochromatosis; HD/CC = H63D heterozygous; HD/CY = compound heterozygous; HH/CC = wild type; HH/CY = C282Y heterozygous; HH/YY = C282Y homozygous; HMO = health maintenance organization; HV = healthy volunteer; ICD-9 = International Classification of Diseases, Ninth Revision; LFT = liver function test; NA = not applicable; ND = not determined; NOAR = Norfolk Arthritis Register; NR = not reported; OS = osteoporosis; PC = primary care; Pheno = phenotype; Pts = patients; TP = therapeutic phlebotomy; TS = transferrin saturation; YY = C282Y/C282Y.

† Values are percentages.

‡  $P \leq 0.001$ ; chi-square test was used to determine the significance in each genotype versus healthy volunteers.

§  $P < 0.01$ ; chi-square test was used to determine the significance in each genotype versus healthy volunteers.
