# Supplementary material
Source: HighWire-hosted journal article supplement (https://www.annals.org/content/suppl/2006/07/31/145.3.209)
Supplement: Whitlock_AT11_145-3-209-DC1-9.pdf [file Whitlock_AT11_145-3-209-DC1-9.pdf]

---

**Appendix Table 11. Study Pending Assessment for Key Question 1**

**Study Citation**

Falize L, Guillygomarch A, Perrin M, Laine F, Guyader D, Brissot P, et al. Reversibility of hepatic fibrosis in treated genetic haemochromatosis: a study of 28 cases [Abstract]. Bioiron Proceedings, May 2005; P234.

**Comment**

Abstract from a meeting. No article published yet.

---
